# Supplementary material for: Single-ion solvation free energy: A new cluster–continuum approach based on the cluster expansion method
Source: Royal Society of Chemistry journal article supplement (doi:10.1039/d1cp03517g), 2021-01-01
Supplement: d1cp03517g1.pdf [file d1cp03517g1.pdf]

## Supporting Information

### **Single-Ion Solvation Free Energy: A New Cluster-Continuum Approach Based on the Cluster Expansion Method**

Virginia C. Rufino and Josefredo R. Pliego Jr.\*

Departamento de Ciências Naturais, Universidade Federal de São João del-Rei  
36301-160, São João del-Rei, MG, Brazil.

Coordinates of the optimized structures, obtained with the X3LYP functional and the def2-SVP basis set (ma-def2-SVP basis set for O, N, and the ions F<sup>-</sup>, Cl<sup>-</sup>, Br<sup>-</sup>, I<sup>-</sup>, PH<sub>2</sub><sup>-</sup>). Solvent effect obtained with the continuum SMD method in water.

### CLUSTERS - Cations

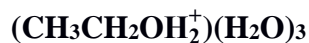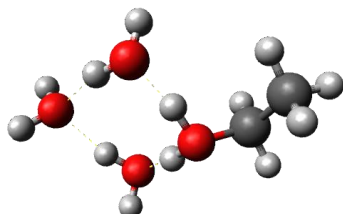

|   |                    |                  |                   |
|---|--------------------|------------------|-------------------|
| C | -10.45883515853978 | 2.97362065405313 | -0.12647388770508 |
| C | -9.11224761698594  | 2.30979139517344 | 0.01462146055328  |
| H | -11.24083213201882 | 2.23907629663645 | 0.11777444025749  |
| H | -10.62361874052087 | 3.33306238889805 | -1.15369517585672 |
| H | -10.56937390615064 | 3.82120453937888 | 0.56784375711131  |
| O | -8.05186096017892  | 3.25647066351774 | -0.34686203443313 |
| H | -8.99041390182912  | 1.46359203802680 | -0.67301401476265 |
| H | -8.92538262901344  | 1.96492836063248 | 1.04196873211918  |
| H | -7.09518859053708  | 2.85925308311116 | -0.17031866486565 |
| H | -8.08524201392637  | 4.13593862067384 | 0.21295824505484  |
| O | -7.89823339424070  | 5.39911821656948 | 0.96802371508140  |
| H | -6.92581820491746  | 5.41388756290051 | 1.14291777243337  |
| H | -8.32122884278116  | 5.45011811560443 | 1.83932836951159  |
| O | -5.75566952513579  | 2.46132407246860 | 0.24901704370522  |
| H | -5.17105864428694  | 2.18049178491198 | -0.47269796819437 |
| H | -5.35875784694664  | 3.28740949447630 | 0.61963004815790  |
| O | -5.18248062185888  | 4.95049397916536 | 1.28683144823654  |
| H | -4.52725142645054  | 5.48896896775649 | 0.81535271005665  |
| H | -4.87495584368081  | 4.94210976604484 | 2.20798400353884  |

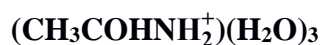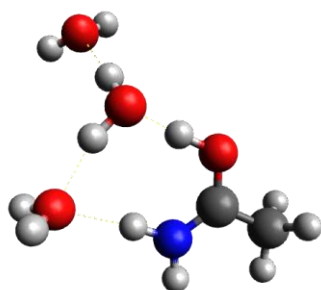

|   |                    |                  |                  |
|---|--------------------|------------------|------------------|
| C | -10.27497843243379 | 2.03004200660950 | 0.65970253265693 |
| H | -9.86168771226592  | 1.22447432932158 | 0.03426610811897 |

|   |                    |                  |                   |
|---|--------------------|------------------|-------------------|
| H | -11.37139633870808 | 1.94069345261859 | 0.63746295927227  |
| H | -9.90593793929158  | 1.92374993705112 | 1.68672678889665  |
| C | -9.87955633800869  | 3.33059822213539 | 0.05959091089854  |
| O | -10.29900241794470 | 3.57379583809300 | -1.13384461646640 |
| N | -9.12709465863161  | 4.17054180104093 | 0.73063227572694  |
| H | -8.82674846759667  | 3.92149490599104 | 1.66946310260035  |
| H | -8.78720630940416  | 5.06620089275601 | 0.35218101289056  |
| O | -8.00449577653559  | 6.66088447925051 | -0.26519300379477 |
| H | -7.05136272495670  | 6.72373288841774 | -0.43573231624646 |
| H | -8.24864947135372  | 7.51521165683132 | 0.12426675626809  |
| O | -9.55479694252001  | 5.66458119656779 | -2.24880792322504 |
| H | -10.28973876732599 | 6.28862472226865 | -2.48554451755237 |
| H | -8.95629612454266  | 6.17347034763486 | -1.65288515190874 |
| O | -11.46977699638835 | 7.45051875330926 | -2.90094082996357 |
| H | -11.49756190219421 | 8.24749045443189 | -2.34996795919182 |
| H | -12.38006600432200 | 7.11537064765370 | -2.89487929256874 |
| H | -9.98691667557583  | 4.49188346801701 | -1.58088683641130 |

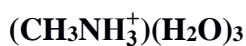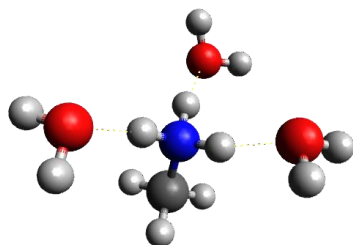

|   |                   |                   |                   |
|---|-------------------|-------------------|-------------------|
| C | -8.97145232659848 | 3.08121001373891  | -0.19246498569678 |
| N | -7.88830421026857 | 2.60657142939522  | 0.69976406504188  |
| H | -7.08572038925267 | 3.27066802658050  | 0.67897443597018  |
| H | -8.22378591241902 | 2.50445608677012  | 1.67715114411195  |
| H | -7.51689041798023 | 1.67900652985408  | 0.40487888218214  |
| H | -9.31838933481879 | 4.06448098889124  | 0.15018127129175  |
| H | -9.80536022194741 | 2.37062370810356  | -0.16848382216888 |
| H | -8.58368662023774 | 3.16372080730083  | -1.21583429371624 |
| O | -6.64074997340973 | 0.06137062887815  | 0.19278790193110  |
| H | -6.21596698466314 | -0.02491861208236 | -0.67491546808113 |
| H | -7.24023583648294 | -0.69900595136024 | 0.23767208512009  |
| O | -8.97485417788605 | 1.94270887782208  | 3.36638102585900  |
| H | -9.79862713246760 | 1.44565960402166  | 3.24885621442339  |
| H | -9.23921984710717 | 2.71582198776059  | 3.88795246969628  |
| O | -5.76790676252344 | 4.44916167244102  | 0.25740353338112  |
| H | -5.24292308601871 | 4.20783137920904  | -0.52154694437351 |
| H | -5.10966676591833 | 4.57920282267561  | 0.95714248502763  |

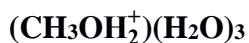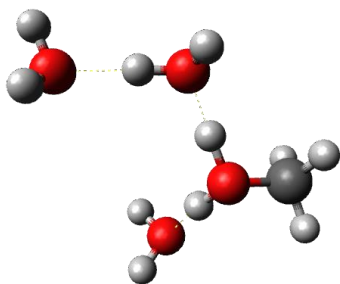

|   |                    |                  |                   |
|---|--------------------|------------------|-------------------|
| C | -10.12614520547820 | 2.94307382457553 | 0.11956529804191  |
| O | -8.68001747487771  | 2.97657758060272 | 0.10456256809301  |
| H | -10.43466318998621 | 1.89404140413423 | 0.04741896492864  |
| H | -10.52671384875948 | 3.52226988227801 | -0.72297697833036 |
| H | -10.46237351165375 | 3.36849660310225 | 1.07248521028221  |
| H | -8.27104975841880  | 2.48703875616629 | -0.75748223863165 |
| H | -8.34106225660324  | 3.94966035234088 | 0.16574021549733  |
| O | -7.78168650206171  | 1.83361695782051 | -1.89129776779279 |
| H | -6.81641052106410  | 2.04995318930335 | -2.03279567471325 |
| H | -7.81323246318715  | 0.87150278367282 | -1.76751763039616 |
| O | -8.00323385310223  | 5.40740140737901 | 0.28761073566291  |
| H | -7.35790662237542  | 5.57725042946398 | 0.99309014057861  |
| H | -7.59883738030830  | 5.78115200963841 | -0.51264525238904 |
| O | -5.23002493095639  | 2.50995025300064 | -2.23711707837543 |
| H | -4.89560538892408  | 2.21317407302553 | -3.09750294870583 |
| H | -4.63526709224325  | 2.09374049349580 | -1.59395756375007 |

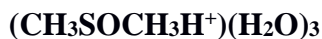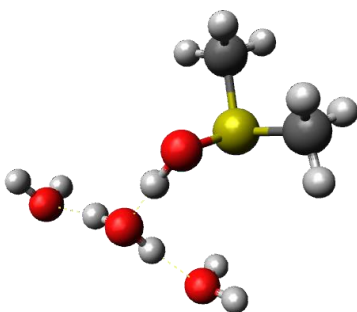

|   |                   |                  |                  |
|---|-------------------|------------------|------------------|
| S | 1.24111155099340  | 6.60643172809139 | 2.74719043979104 |
| O | 0.25973862048510  | 5.32841362089562 | 2.77315069075133 |
| C | 0.11694237224113  | 8.00396785387464 | 2.80487491925589 |
| C | 1.88696222828755  | 6.62539834144446 | 4.41874396032025 |
| H | -0.40881640369251 | 8.04710168243572 | 1.84175001060598 |
| H | 0.74137032547024  | 8.90074624199156 | 2.93837927220861 |
| H | -0.58320128404169 | 7.87864484791568 | 3.64241752175852 |
| H | 2.55217056089097  | 5.75852991286861 | 4.52662697422792 |
| H | 1.05041262577857  | 6.58621285709988 | 5.12999794808999 |
| H | 2.45897929699858  | 7.55907668527234 | 4.52924281766453 |

|   |                   |                  |                   |
|---|-------------------|------------------|-------------------|
| H | 0.41301339925156  | 4.71720908860797 | 1.89887894667821  |
| O | 0.66660844526050  | 3.86964140423003 | 0.82360262380230  |
| H | 0.19685687270661  | 3.98730770395195 | -0.04046424550871 |
| H | 1.63873157316955  | 3.85469909723614 | 0.63542757901876  |
| O | 3.37891512758140  | 3.88939050740027 | 0.51201984301785  |
| H | 3.74312761760620  | 4.69434209195995 | 0.11190322574459  |
| H | 3.87151619428557  | 3.78453007380641 | 1.34062626837293  |
| O | -0.61854337496443 | 4.01188055557253 | -1.59101918557799 |
| H | -0.41123267127452 | 4.80698351714821 | -2.10630216648658 |
| H | -1.57954307703379 | 4.05117218819647 | -1.46582744373543 |

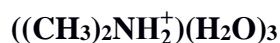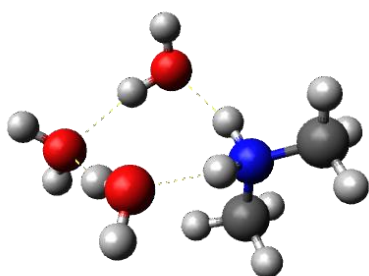

|   |                   |                   |                   |
|---|-------------------|-------------------|-------------------|
| C | -8.89592817688339 | 3.24894006525601  | -0.24921195191554 |
| N | -7.74468512071335 | 2.80517240494629  | 0.56887548537154  |
| H | -8.54763435391121 | 3.97579928437233  | -0.99390609209415 |
| H | -9.64733211393746 | 3.71319494680703  | 0.40163687079514  |
| H | -9.33231644740423 | 2.37941186525110  | -0.75636405314356 |
| C | -7.06730882412941 | 3.88875210278073  | 1.31993841288800  |
| H | -6.23538816746704 | 3.45919074357429  | 1.89182881299308  |
| H | -7.78375821047359 | 4.35402584996128  | 2.00950039297222  |
| H | -6.68310731021220 | 4.63787550767562  | 0.61721752113773  |
| H | -7.04401807963806 | 2.32330950503685  | -0.03770922871056 |
| H | -8.03105661901697 | 2.07983228881706  | 1.26058121468507  |
| O | -5.64556131162585 | 1.30544205091554  | -0.65857391220610 |
| H | -5.30213658687251 | 0.95529845164638  | 0.19219052238894  |
| H | -5.91297210368123 | 0.52174045876003  | -1.16141534499820 |
| O | -7.73265582145816 | 0.77983253045272  | 2.53791416617496  |
| H | -6.75926078232729 | 0.65328747928104  | 2.53734891120048  |
| H | -7.96966099164930 | 0.96410102430461  | 3.45855374931084  |
| O | -4.99875771888852 | 0.50117880076876  | 2.01853696918654  |
| H | -4.32996238365133 | 1.01686018269749  | 2.49485889787229  |
| H | -4.68694887605884 | -0.41566554330512 | 2.08162865609130  |

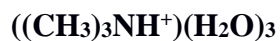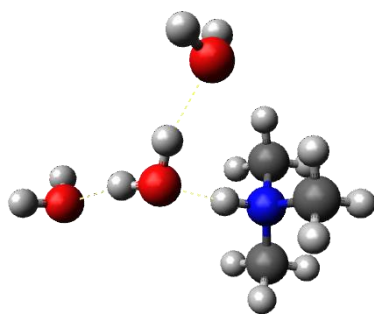

|   |                   |                  |                   |
|---|-------------------|------------------|-------------------|
| N | -4.27854760651530 | 4.69021074675240 | -2.97146151651126 |
| C | -3.63624259964963 | 3.53272386943060 | -3.65061411854852 |
| H | -3.04174504159572 | 2.97011574789442 | -2.91932572681839 |
| H | -2.98113551810087 | 3.90515346385579 | -4.44792287243892 |
| H | -4.41313002656590 | 2.88469694682625 | -4.07750198370321 |
| C | -5.03933038026275 | 5.53378375642904 | -3.93104794642688 |
| H | -5.46556683069525 | 6.39113906772833 | -3.39645712116396 |
| H | -5.84241112786805 | 4.93758472296501 | -4.38411420600779 |
| H | -4.35794861173259 | 5.89125089434738 | -4.71307968471529 |
| C | -5.11402247718635 | 4.26537111790664 | -1.81887888954658 |
| H | -4.48810747967961 | 3.70770568592396 | -1.11109442525171 |
| H | -5.93119737320873 | 3.62610415338997 | -2.17788678414020 |
| H | -5.52504378435177 | 5.15553798264130 | -1.32629574709736 |
| H | -3.48788576305669 | 5.28411169380696 | -2.59449164722154 |
| O | -2.07849599835933 | 6.10889144053203 | -2.21633726288542 |
| H | -1.67595861729844 | 6.26189230399936 | -3.09828282332315 |
| H | -2.17159194590300 | 6.97789241366042 | -1.76126216121730 |
| O | -2.52327816356348 | 8.31107095515418 | -0.65147652024681 |
| H | -2.98540417377694 | 9.06919399048541 | -1.04090874749986 |
| H | -1.71526347990679 | 8.69227727965119 | -0.27424418182325 |
| O | -1.21041752701804 | 6.02840669499279 | -4.90761204668096 |
| H | -0.31073369718690 | 6.36837076758972 | -5.03480295017834 |
| H | -1.74613177652006 | 6.56731430402734 | -5.50963063658595 |

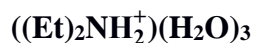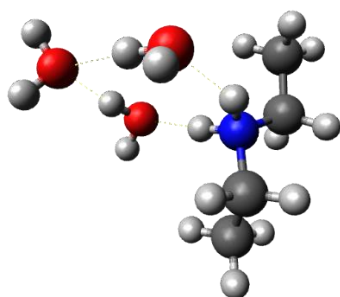

|   |                  |                  |                  |
|---|------------------|------------------|------------------|
| N | 2.16754366354546 | 5.35745413234231 | 3.34689386553791 |
|---|------------------|------------------|------------------|

|   |                   |                  |                   |
|---|-------------------|------------------|-------------------|
| C | 2.17959334035490  | 4.58159684620135 | 4.62618283636392  |
| C | 1.53645827057361  | 3.21868871911092 | 4.45744608674508  |
| H | 1.65529836239372  | 5.18293992902234 | 5.38050563491767  |
| H | 3.22923781489681  | 4.48187716296161 | 4.93543819581691  |
| H | 0.48337248320184  | 3.29483526678545 | 4.14279892213090  |
| H | 1.56765892227890  | 2.68565330458113 | 5.41938961567553  |
| H | 2.08072744085684  | 2.61010027622717 | 3.71847955014665  |
| C | 3.08512493768360  | 6.54124816328722 | 3.29436920947470  |
| H | 1.18892415159785  | 5.66995357492563 | 3.13503391951173  |
| C | 2.59536415611798  | 7.72801059307729 | 4.10166812953852  |
| H | 3.17790608352386  | 6.81023475107981 | 2.23295286376959  |
| H | 4.06971720969239  | 6.19561024858466 | 3.64105351125203  |
| H | 1.60447380534976  | 8.06822513789062 | 3.76037515311624  |
| H | 3.29803246256585  | 8.56219965163748 | 3.95597897681333  |
| H | 2.54664314596647  | 7.51323718526050 | 5.18004434074572  |
| H | 2.40509787241446  | 4.74610624792029 | 2.54392197945589  |
| O | -0.46370919164098 | 6.07764498340403 | 2.61732917601810  |
| H | -0.54098274904003 | 5.96793518613143 | 1.64264011560046  |
| H | -0.76606041910283 | 6.98162093058032 | 2.79037074441635  |
| O | 2.16990291053026  | 4.35369144865884 | 0.62440389496128  |
| H | 2.83925901327470  | 4.73213740483116 | 0.03556134241466  |
| H | 1.32280131875330  | 4.72716613555879 | 0.30177823380825  |
| O | -0.36483360468136 | 5.60662260823218 | -0.13669340643861 |
| H | -0.22141176473825 | 6.37359413792661 | -0.71263297025161 |
| H | -1.04875963636916 | 5.08376597378086 | -0.58404992154127 |

**((Et)<sub>3</sub>NH<sup>+</sup>)(H<sub>2</sub>O)<sub>3</sub>**

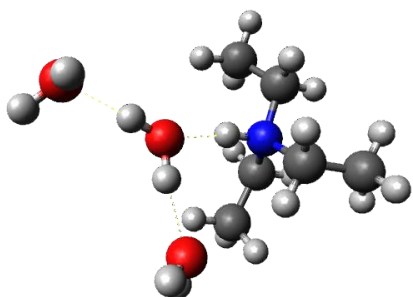

|   |                  |                  |                  |
|---|------------------|------------------|------------------|
| N | 2.48733113549187 | 5.80670780902463 | 3.30404067539730 |
| C | 2.15682100379808 | 5.15552045336947 | 4.62865281119542 |
| C | 1.84128880223885 | 6.11622094543234 | 5.76007450117165 |
| H | 3.00719183350408 | 4.51075741620484 | 4.88327776835397 |
| H | 1.30072293881688 | 4.49738311368784 | 4.42694229317567 |
| H | 2.70206696795870 | 6.74085142589809 | 6.04168401943462 |
| H | 1.56745971366358 | 5.51535369366730 | 6.64033700353255 |
| H | 0.99064077617606 | 6.77448990988894 | 5.53280357978409 |
| C | 3.72778503358471 | 6.66205281579308 | 3.32925966386547 |
| C | 1.30604749950356 | 6.54949275102367 | 2.73262244227724 |
| C | 5.00475189089885 | 5.90471013499735 | 3.64405464578448 |

|   |                  |                  |                  |
|---|------------------|------------------|------------------|
| H | 3.54540998558126 | 7.47549818249971 | 4.04390395923949 |
| H | 3.80819780502484 | 7.11444665120546 | 2.33488029227205 |
| H | 5.03676512141659 | 5.51332520038706 | 4.67126918992533 |
| H | 5.84711191627348 | 6.60306630597953 | 3.52747486706796 |
| H | 5.16690402437989 | 5.07696627816266 | 2.93740450710060 |
| C | 1.46829034921288 | 6.89925494414847 | 1.26313381712387 |
| H | 1.15621698886387 | 7.44964120394639 | 3.34295001698322 |
| H | 0.43913441426032 | 5.89105845328877 | 2.87848287612962 |
| H | 2.22820613917424 | 7.67307224549811 | 1.08621044326187 |
| H | 0.51069079226075 | 7.29488535697884 | 0.89349338925366 |
| H | 1.72215240954014 | 6.01343918263053 | 0.65911134612585 |
| H | 2.67055215780438 | 5.00379048259470 | 2.66203737446693 |
| O | 2.96267294793217 | 3.33067053253549 | 1.96985938800255 |
| H | 3.52727717985308 | 2.89787912794255 | 2.64852809769166 |
| H | 2.71328242533893 | 2.62346737074816 | 1.33554986197280 |
| O | 4.49483800085896 | 2.45255790399890 | 4.08801954162193 |
| H | 5.41351402160798 | 2.76154043414732 | 4.11025101369609 |
| H | 4.55164515154752 | 1.51276284413894 | 4.31786079340489 |
| O | 2.28198969048271 | 1.19866862880948 | 0.26262924636463 |
| H | 3.07061958466584 | 0.68867353612250 | 0.02050409790127 |
| H | 1.75148129828476 | 0.57597466524902 | 0.78352647642127 |

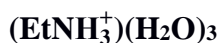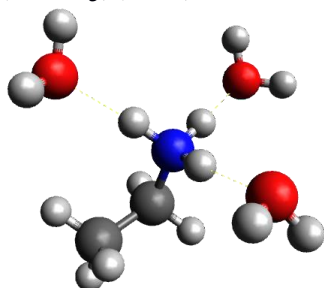

|   |                   |                  |                  |
|---|-------------------|------------------|------------------|
| N | 2.20657886625517  | 5.66814667806925 | 3.26765874062205 |
| C | 1.86560748867101  | 4.79395603466327 | 4.42923576923509 |
| C | 1.05211902115066  | 3.58663831695879 | 4.00302221920051 |
| H | 1.31932665237270  | 5.41641191272379 | 5.15152358189446 |
| H | 2.81084847643861  | 4.48740036257906 | 4.89840465567065 |
| H | 0.12339923915124  | 3.88417599964348 | 3.49036395355670 |
| H | 0.77446744002019  | 2.99779411029962 | 4.88952899959997 |
| H | 1.62879804315950  | 2.93296401673286 | 3.33023688140086 |
| H | 1.36643715947427  | 6.17869178719905 | 2.92602318646497 |
| H | 2.58803969097193  | 5.10825410529408 | 2.47647660535625 |
| H | 2.91925338219427  | 6.38245006659355 | 3.53226786629795 |
| O | -0.06516662748368 | 7.28743508143718 | 2.48638072232557 |
| H | -0.75168845707331 | 6.84031425989759 | 1.96805638726744 |
| H | -0.54806673612101 | 7.67801889307865 | 3.23111606552254 |
| O | 4.19107687439758  | 7.55048532490635 | 3.98738213499016 |



|   |                  |                  |                  |
|---|------------------|------------------|------------------|
| H | 4.86766941009384 | 7.70274371863946 | 3.30974257426876 |
| H | 3.87473349373662 | 8.43780759502019 | 4.21759921289671 |
| O | 3.13559103505772 | 4.00311308862057 | 1.10240302387684 |
| H | 3.71192039671054 | 4.44305623531637 | 0.45870611347710 |
| H | 2.41211515082214 | 3.64330241232693 | 0.56621130607542 |

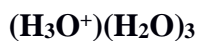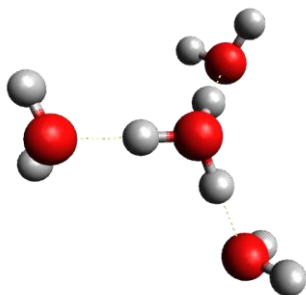

|   |                  |                  |                   |
|---|------------------|------------------|-------------------|
| O | 2.05594504392954 | 1.82398319337451 | -1.15045797603284 |
| H | 2.85301813656348 | 2.40807299956268 | -0.87687606316187 |
| H | 1.71238001899620 | 1.32175150799568 | -0.32951329661765 |
| H | 1.32166371981111 | 2.42927619019673 | -1.52670416768296 |
| O | 0.24152700987671 | 3.36678540740795 | -2.12261962707298 |
| H | 0.11923618784739 | 3.16911212047029 | -3.06566586815435 |
| H | 0.53598966062817 | 4.29191124610948 | -2.10561222960314 |
| O | 4.02619779894559 | 3.34245391540451 | -0.52980435124013 |
| H | 4.22055030348521 | 3.39222051130247 | 0.42006791507999  |
| H | 4.85857713049311 | 3.05276389053475 | -0.93708393430138 |
| O | 1.18973340802455 | 0.51251069552733 | 0.90479869854952  |
| H | 1.90047225341046 | 0.09902750343769 | 1.42136791854108  |
| H | 0.72563932798842 | 1.08173081867599 | 1.53965298169660  |

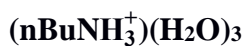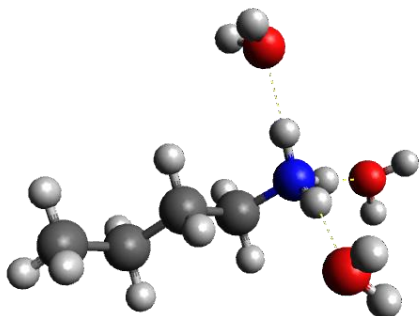

|   |                  |                  |                   |
|---|------------------|------------------|-------------------|
| C | 1.95694410517648 | 1.28778788857584 | -1.38533055029580 |
| N | 3.19975651791617 | 1.55503805912197 | -2.16455827985366 |
| H | 2.99948846970059 | 2.16099664670571 | -2.98946096240267 |
| H | 3.91186563192470 | 2.03934643658285 | -1.57993487370336 |
| C | 2.24781469411059 | 0.47898136883891 | -0.13012102647744 |
| H | 1.26528367627038 | 0.75404570699425 | -2.05266306175290 |
| H | 1.50338278489227 | 2.25824676609901 | -1.13680649574191 |

|   |                  |                   |                   |
|---|------------------|-------------------|-------------------|
| C | 0.97907206782815 | 0.11185601768081  | 0.64452628835069  |
| H | 2.92575324675304 | 1.05591631692743  | 0.52317459098523  |
| H | 2.78958137351371 | -0.44192782327384 | -0.40976020759017 |
| C | 1.27962148712483 | -0.65713960399441 | 1.92908303856388  |
| H | 0.41384672478787 | 1.03003863614114  | 0.88499398362937  |
| H | 0.32115445947859 | -0.49189507964460 | -0.00529448994415 |
| H | 1.90011490140210 | -0.05991828411761 | 2.61761419230869  |
| H | 1.82788331619841 | -1.58992434982570 | 1.71456665145299  |
| H | 0.35524313053820 | -0.92946142943770 | 2.46266316604066  |
| H | 3.59059069801721 | 0.65817993418583  | -2.51910436343293 |
| O | 3.78867806912511 | -1.09540196028073 | -3.09580992676280 |
| H | 4.70036586738232 | -1.42104062678030 | -3.04340282519719 |
| H | 3.53989099064157 | -1.24262647683128 | -4.02161087253344 |
| O | 5.03171595262732 | 3.07332170998928  | -0.51172320551468 |
| H | 5.69516146780364 | 2.57883371851334  | -0.00700283276711 |
| H | 4.58011999879067 | 3.61446625724848  | 0.15370001546511  |
| O | 2.63418999524524 | 3.30953225998795  | -4.32475688126703 |
| H | 3.37856159464644 | 3.44765861456662  | -4.93141843178158 |
| H | 1.88991877810431 | 3.09063929602676  | -4.90701263977785 |

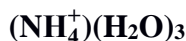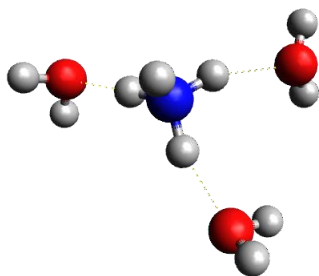

|   |                   |                   |                   |
|---|-------------------|-------------------|-------------------|
| N | 1.30643912573307  | 2.56879086221091  | -0.38725662419893 |
| H | 2.08526077484695  | 3.07699376489348  | 0.04283685784949  |
| H | 1.16037885351531  | 2.92151491469992  | -1.35544461309519 |
| H | 0.45039804729495  | 2.68698518450981  | 0.19587560899671  |
| H | 1.56131480568858  | 1.56526644113543  | -0.48692488404439 |
| O | 1.91663849920470  | -0.09108795017367 | -1.25288536425681 |
| H | 2.85817163166023  | -0.32149528094461 | -1.27854393526648 |
| H | 1.63402919632842  | -0.15199178912128 | -2.17865490949593 |
| O | -1.00654112814916 | 2.91941093828840  | 1.27642457764313  |
| H | -0.69442546823280 | 3.07451953858508  | 2.18172601258820  |
| H | -1.51054215944755 | 2.09280867877684  | 1.33546882332213  |
| O | 1.21730827318329  | 2.96700299446115  | -3.19240875268802 |
| H | 0.86344917442711  | 3.78784795417588  | -3.56972213290393 |
| H | 0.70875037394691  | 2.26972374850267  | -3.63542066445001 |

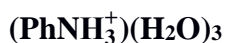

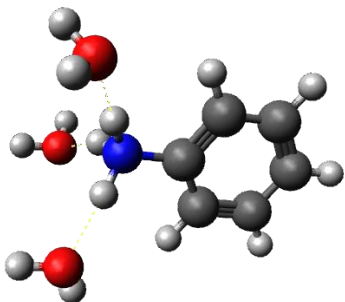

|   |                  |                  |                   |
|---|------------------|------------------|-------------------|
| H | 3.76706096439613 | 1.41225001985673 | -2.27911906460639 |
| C | 3.38555911881689 | 2.37352338360657 | -1.92783881937244 |
| C | 2.26853996625184 | 2.43166490982054 | -1.08804398033406 |
| H | 1.76950703617332 | 1.51267207039088 | -0.77280055244562 |
| C | 1.78750652265713 | 3.66880641423332 | -0.65023315213350 |
| H | 0.90981985088440 | 3.72072585376879 | -0.00237185385285 |
| C | 2.42182388146399 | 4.85117730148817 | -1.04350088310974 |
| H | 2.04693430306241 | 5.81828417623631 | -0.70318779984347 |
| C | 3.53918318325161 | 4.77703027278150 | -1.87523445654721 |
| C | 4.02669982295556 | 3.54890945099660 | -2.32620478360416 |
| H | 4.90373128800901 | 3.50563578466871 | -2.97570251072808 |
| N | 4.24303539503089 | 5.99631083096458 | -2.26070340064507 |
| H | 3.65970775318187 | 6.85890823735464 | -2.15740816166765 |
| H | 5.11906399775421 | 6.12242347320389 | -1.69885862118069 |
| H | 4.59253613091095 | 5.94196053544974 | -3.24182086477543 |
| O | 2.71556649636519 | 8.35450813192023 | -2.00975445342542 |
| H | 3.08438394157548 | 9.05814171807815 | -1.45430451268973 |
| H | 2.50782741883853 | 8.79304677632691 | -2.84999069104493 |
| O | 5.65537722786888 | 5.70497544202030 | -4.73804634267777 |
| H | 6.22565096068453 | 4.92400859802339 | -4.81076413425654 |
| H | 6.23852478366712 | 6.44680606942580 | -4.96126210055695 |
| O | 6.84422370229101 | 6.13303077758279 | -1.25361787433898 |
| H | 7.29194740158011 | 6.93801122865783 | -1.55734191082370 |
| H | 7.01647885232879 | 6.10931854314348 | -0.29973907533966 |

**(PrNH<sub>3</sub><sup>+</sup>)(H<sub>2</sub>O)<sub>3</sub>**

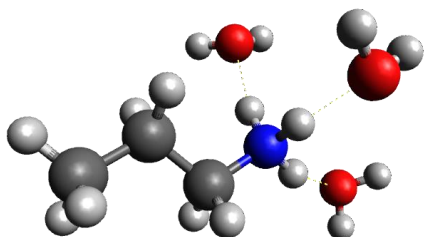

|   |                  |                  |                   |
|---|------------------|------------------|-------------------|
| N | 3.93085333107218 | 5.43582461333938 | -2.40326598357095 |
| C | 3.17536171109135 | 4.36031279303545 | -1.70118626504253 |
| H | 4.91742079124006 | 5.49266495512648 | -2.07344949626252 |
| H | 3.52584198558025 | 6.38315175089352 | -2.27158894179134 |
| C | 4.03359112492296 | 3.11441442681886 | -1.52258101315967 |

|   |                  |                  |                   |
|---|------------------|------------------|-------------------|
| H | 2.27467764329310 | 4.14775557504986 | -2.29448783268130 |
| H | 2.84794368661254 | 4.75808187740964 | -0.73054391798056 |
| C | 3.23638176139627 | 1.93077642063527 | -0.98521856089785 |
| H | 4.49140554797765 | 2.83982871917627 | -2.48949213639267 |
| H | 4.86650305270158 | 3.34967146157893 | -0.83774751847112 |
| H | 2.43671119615936 | 1.63702694695702 | -1.68356908536500 |
| H | 2.76363986791770 | 2.16493700041806 | -0.01669201759097 |
| H | 3.88943778297022 | 1.05747314562123 | -0.83580271353618 |
| H | 3.98076591445637 | 5.26986749687550 | -3.43043037580753 |
| O | 3.48291006224874 | 8.24657225976195 | -2.13924731127711 |
| H | 3.57572883073007 | 8.70901765816216 | -2.98630335378008 |
| H | 2.64833671090206 | 8.58249126035783 | -1.77661947606869 |
| O | 4.16414627473742 | 5.20084938105217 | -5.25295822290437 |
| H | 4.64881963155584 | 4.41511379136335 | -5.55121459458980 |
| H | 4.68588182782033 | 5.94231074274965 | -5.59778811326842 |
| O | 6.73542108523565 | 5.49319599084989 | -1.92214098095841 |
| H | 7.02563662744982 | 5.18781702111181 | -1.04846320089677 |
| H | 7.13984355192841 | 6.37006471165558 | -2.01071888770622 |

**(PyridineH<sup>+</sup>)(H<sub>2</sub>O)<sub>3</sub>**

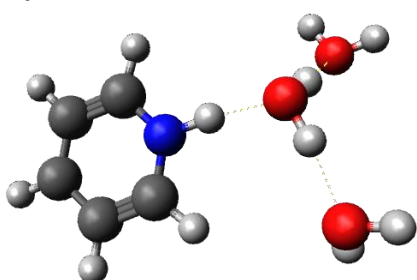

|   |                   |                   |                   |
|---|-------------------|-------------------|-------------------|
| H | 0.23284295005133  | 5.41043491893579  | -2.33891879250460 |
| C | 0.21823143076194  | 4.62508702543269  | -1.58319649087191 |
| C | 0.24270581424267  | 4.87620982687128  | -0.21970013307972 |
| H | 0.27865632484564  | 5.90421862995235  | 0.14115278640978  |
| C | 0.22479651194468  | 3.79535304315958  | 0.66612994020450  |
| H | 0.24510577640944  | 3.97323790155687  | 1.74361231117793  |
| C | 0.18176617798484  | 2.48882106470708  | 0.17009167705254  |
| H | 0.16655090480420  | 1.62563023320452  | 0.83487516876999  |
| C | 0.15772576058821  | 2.29679353583823  | -1.20212669115290 |
| H | 0.12326789428517  | 1.31290687407917  | -1.67170245872180 |
| N | 0.17567926165300  | 3.35674521244736  | -2.03071134599956 |
| H | 0.15783499014474  | 3.16368102100090  | -3.07355764163019 |
| O | 0.14542136097527  | 2.67160086034960  | -4.65643526410718 |
| H | -0.67649416484179 | 2.95913128368075  | -5.11770572429073 |
| H | 0.13187828617822  | 1.68585989782766  | -4.66755977490683 |
| O | -2.20358055936674 | 3.56179638791986  | -5.83468333743148 |
| H | -2.29863816539646 | 3.43460972038035  | -6.79113208933147 |
| H | -2.36444471759739 | 4.50901892696581  | -5.70301745732863 |
| O | 0.19184478461440  | -0.09860884683405 | -4.47338427127081 |

|   |                   |                   |                   |
|---|-------------------|-------------------|-------------------|
| H | -0.66866763009476 | -0.43753590672081 | -4.18087775546225 |
| H | 0.35010700781336  | -0.55327161075501 | -5.31503265552460 |

### CLUSTERS – Anions

#### (Br<sup>-</sup>)(H<sub>2</sub>O)<sub>3</sub>

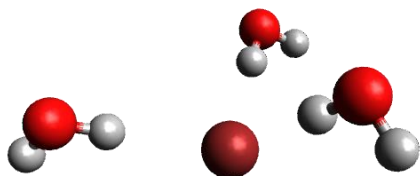

|    |                    |                  |                   |
|----|--------------------|------------------|-------------------|
| Br | -11.06724107169761 | 3.96643790294414 | -2.51003994945425 |
| O  | -7.95715944646623  | 4.19915702212709 | -1.35603588062784 |
| H  | -7.99585941923735  | 3.83842863241144 | -0.45829714941989 |
| H  | -8.87778439044221  | 4.12230508101356 | -1.69460630434683 |
| O  | -12.21968784566007 | 6.73978518136423 | -1.13249492172048 |
| H  | -11.88233687477442 | 5.90957402083792 | -1.54035515270033 |
| H  | -13.07564425596230 | 6.49092009260559 | -0.75342042524549 |
| O  | -10.93217962018242 | 4.61826733963033 | -5.79027091419001 |
| H  | -10.97801966390429 | 4.43852826510513 | -4.82383996863135 |
| H  | -10.91040741167298 | 3.73854646196047 | -6.19447933366357 |

#### (CH<sub>2</sub>CHO<sup>-</sup>)(H<sub>2</sub>O)<sub>3</sub>

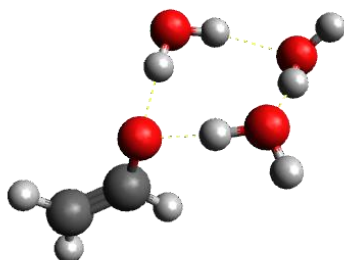

|   |                   |                  |                   |
|---|-------------------|------------------|-------------------|
| C | -6.98694584501726 | 4.54629013805451 | -1.56483512778507 |
| O | -7.40904097135662 | 4.13035074451327 | -0.37973066285780 |
| C | -7.53173061740266 | 4.27291085885776 | -2.77261248809037 |
| H | -6.07924284204249 | 5.18510288135701 | -1.54863299576841 |
| H | -8.42948743386130 | 3.65318818314517 | -2.87674678530541 |
| H | -7.08037545324471 | 4.68661424570741 | -3.67790806871052 |
| O | -5.67294877444602 | 4.41137797045586 | 1.49736213130382  |
| H | -4.81061011969547 | 4.09964373968580 | 1.18928299995343  |
| H | -6.32677614729608 | 4.26590494264337 | 0.72208415261684  |
| O | -8.63919218554973 | 6.04781328955582 | 1.21238067905057  |
| H | -8.22092189381274 | 5.37417898783895 | 0.61908395284146  |
| H | -7.90111698605459 | 6.38258608334207 | 1.76196367831121  |
| O | -6.22397089208595 | 6.83018335324586 | 2.49961565545493  |
| H | -5.88078733110991 | 5.95467514780930 | 2.18168921395695  |

H -6.09829250702451    6.81710943378783    3.45937366502838

**(CH<sub>2</sub>CN<sup>-</sup>)(H<sub>2</sub>O)<sub>3</sub>**

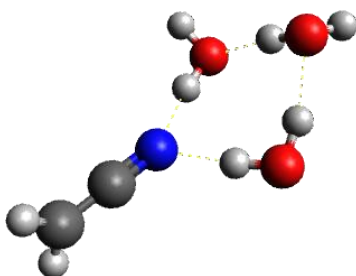

|   |                   |                  |                   |
|---|-------------------|------------------|-------------------|
| C | -5.68481649652223 | 5.16243712249381 | -1.71584026246548 |
| C | -4.40775793759992 | 4.84343183098409 | -2.02235476466706 |
| N | -3.27024644093058 | 4.56074833781514 | -2.28714662025990 |
| O | 0.70676160433886  | 4.54035875829223 | -2.11743902364961 |
| H | 1.46186381473026  | 3.95543935289354 | -2.27563520430485 |
| H | 0.11095112294610  | 4.40944412223039 | -2.89879406846138 |
| O | -1.38330172508716 | 3.75316205694620 | -0.39037563425220 |
| H | -2.10172087975009 | 4.03647706882459 | -1.01879519206744 |
| H | -0.56270523259279 | 3.99790385883199 | -0.86840360093813 |
| O | -1.18651477074154 | 4.21452059928273 | -4.02039789530367 |
| H | -1.23513670563513 | 4.85249496591912 | -4.74716025388718 |
| H | -2.01027511407277 | 4.37364013742831 | -3.46980706509412 |
| H | -6.46746930174716 | 4.40120190269722 | -1.75294443275577 |
| H | -5.93370193733584 | 6.16614988536060 | -1.36292598189320 |

**(CH<sub>2</sub>COOEt<sup>-</sup>)(H<sub>2</sub>O)<sub>3</sub>**

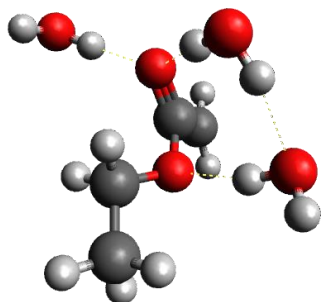

|   |                   |                  |                   |
|---|-------------------|------------------|-------------------|
| C | -6.91067442936428 | 5.05029832915541 | -1.97566974252406 |
| O | -6.45346628797208 | 5.93062180091554 | -1.14404080458223 |
| C | -8.08933861292117 | 5.05374498431379 | -2.65158682091717 |
| O | -6.04965442111358 | 3.96604129301313 | -2.26153360896532 |
| H | -8.76839765434452 | 5.90321830327027 | -2.55518561803898 |
| H | -8.37172581902232 | 4.21625140391965 | -3.29102891246674 |
| C | -5.33779324592482 | 3.38593950261488 | -1.15144052565623 |
| C | -4.64085270981475 | 2.12772358464504 | -1.62849067579254 |
| H | -6.05969716877147 | 3.15535752596136 | -0.34996225695051 |
| H | -4.60880773460291 | 4.10846366742651 | -0.75198267162058 |

|   |                   |                  |                   |
|---|-------------------|------------------|-------------------|
| H | -5.36207269350795 | 1.40007134565746 | -2.03264696835552 |
| H | -4.11048052809767 | 1.65468064859242 | -0.78682732326054 |
| H | -3.89617120869865 | 2.35138109322637 | -2.40933071226220 |
| O | -7.54912592982665 | 5.97040773245293 | 1.30858227985936  |
| H | -7.12957306851340 | 5.93905122499062 | 0.40454435728164  |
| H | -6.83134792948667 | 5.73762860827140 | 1.91438994737879  |
| O | -4.07582394144432 | 6.85468702757384 | -2.10433938789203 |
| H | -4.91843847508659 | 6.53216477299084 | -1.68987974853563 |
| H | -3.97103811139715 | 6.27343220533687 | -2.88171252234315 |
| O | -4.33339994788520 | 4.89560893307951 | -4.23435583815982 |
| H | -3.66714600583971 | 4.23773531215436 | -4.48130987838304 |
| H | -4.94060407636414 | 4.42887070043784 | -3.61544256781343 |

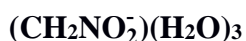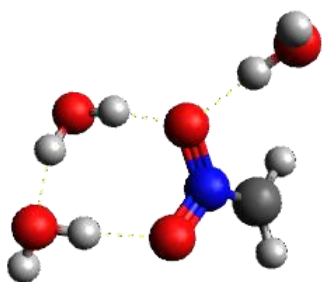

|   |                   |                  |                   |
|---|-------------------|------------------|-------------------|
| N | -6.95754055190823 | 3.90962193578504 | -1.25496241499866 |
| O | -6.73115459312039 | 3.77942671614916 | 0.03144222304878  |
| C | -7.97544570008165 | 3.32876935574928 | -1.82512087164116 |
| H | -8.63673172737055 | 2.72532009569337 | -1.20777120232933 |
| H | -8.12404955136908 | 3.48395864017049 | -2.89154564463111 |
| O | -6.11699332226472 | 4.64785088295877 | -1.91802357781746 |
| O | -4.53613607598767 | 2.10293996288060 | 0.32566847292221  |
| H | -5.36944719120729 | 2.62873264237510 | 0.32849997622155  |
| H | -3.96642971982247 | 2.63998882204868 | -0.26344343254067 |
| O | -3.51201406306654 | 4.03320499381671 | -1.46535822537922 |
| H | -3.14556248519518 | 3.73220481090063 | -2.30886128845261 |
| H | -4.45594759822400 | 4.27479313532248 | -1.66015337387012 |
| O | -8.95298133835758 | 4.48667025487033 | 1.39006975099018  |
| H | -8.77432220905400 | 5.36198657668819 | 1.76177777111054  |
| H | -8.11366387297055 | 4.23523117459116 | 0.92647183736701  |

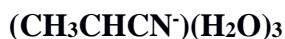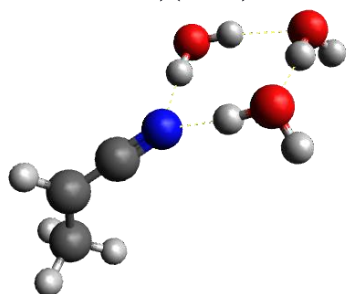

|   |                   |                  |                   |
|---|-------------------|------------------|-------------------|
| C | -6.12651784993033 | 6.82139331185862 | -1.65374561234594 |
| C | -5.75979542986643 | 5.36831072756222 | -1.84422089438738 |
| H | -6.58022167279432 | 7.03454330120027 | -0.66412307444213 |
| H | -6.85781724990778 | 7.17652482056708 | -2.40316593591534 |
| H | -5.23996425824065 | 7.47065157102308 | -1.74366431886013 |
| C | -4.49089115632604 | 4.91538433578363 | -1.91783257133694 |
| H | -6.55792036769468 | 4.61908717734780 | -1.88789597348449 |
| N | -3.35535500046189 | 4.50926352590503 | -1.97399802801021 |
| O | 0.49876057017335  | 3.50129215239484 | -1.52305810115990 |
| H | 1.04479022952487  | 4.29839137860013 | -1.45617870469262 |
| H | -0.05786933275737 | 3.64394142183232 | -2.32832732197264 |
| O | -1.84230249452273 | 3.68372074811974 | 0.17403315158824  |
| H | -2.43618572313012 | 4.00746926265790 | -0.56389035467485 |
| H | -0.97408186219070 | 3.59102910012948 | -0.26859108354071 |
| O | -1.27149928005752 | 3.86562623946555 | -3.61664909402721 |
| H | -1.06414564040188 | 4.63013035530873 | -4.17377728881133 |
| H | -2.08335348141576 | 4.14043057024363 | -3.08729479392646 |

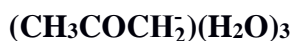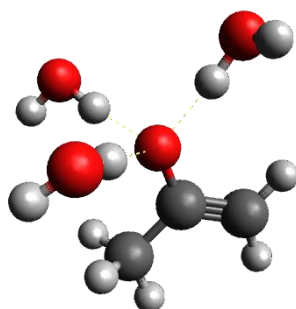

|   |                   |                  |                   |
|---|-------------------|------------------|-------------------|
| C | -5.72837589421008 | 5.07380711386053 | -2.27019557503413 |
| O | -5.24419216991717 | 6.06579067969753 | -1.51649252376401 |
| C | -6.60817904632232 | 5.53090852149175 | -3.41225605669569 |
| H | -6.04380784529949 | 6.20252816696392 | -4.08268066813344 |
| H | -7.46218489099905 | 6.11419831683318 | -3.02645899669568 |
| H | -7.00286272816403 | 4.69365873116464 | -4.00619415732882 |
| C | -5.47128202743905 | 3.76186377349412 | -2.04599440373548 |
| H | -5.90009219722094 | 2.99062969238888 | -2.68972413208070 |
| H | -4.83684937635813 | 3.44115535684719 | -1.21379660603197 |



|   |                   |                  |                   |
|---|-------------------|------------------|-------------------|
| O | -3.90795958337597 | 8.15358914173365 | -2.44169195855030 |
| H | -4.26141904302599 | 8.39188433286938 | -3.31002104942667 |
| H | -4.43237852242012 | 7.34721499674373 | -2.15968389791003 |
| O | -7.12476590076172 | 7.68627690301160 | -0.53926340176542 |
| H | -6.42346970764543 | 7.09233588047131 | -0.93796805202988 |
| H | -7.54414318387676 | 8.12122854693023 | -1.29462650142334 |
| O | -3.73318471836043 | 5.62668043464634 | 0.59974490176427  |
| H | -4.32671351398089 | 5.74200663578977 | -0.20598944210541 |
| H | -4.33705965062226 | 5.40066277506216 | 1.32113252094672  |

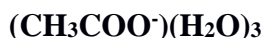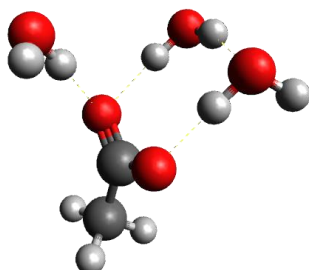

|   |                   |                  |                   |
|---|-------------------|------------------|-------------------|
| C | -5.70718058755912 | 5.52745278821517 | -2.28237907463901 |
| O | -5.09298189147630 | 6.60044377591931 | -2.01961147860528 |
| C | -7.12474109287779 | 5.63468770130951 | -2.81110795267506 |
| H | -7.20099704902525 | 6.43418861916133 | -3.56236498244821 |
| H | -7.78564546235164 | 5.91294068387380 | -1.97318552430418 |
| H | -7.47745843924138 | 4.68589320440548 | -3.23650945274484 |
| O | -5.21070778743167 | 4.36726375697600 | -2.10943554177243 |
| O | -3.92008816750971 | 4.05908755929136 | 0.35384608915483  |
| H | -3.59699671565711 | 4.97929592491913 | 0.43672708168996  |
| H | -4.38442732962882 | 4.07707601738385 | -0.51394037748754 |
| O | -3.31180425777022 | 6.84615771173273 | 0.03086655054559  |
| H | -3.80291162788690 | 7.36709224162612 | 0.68322700253251  |
| H | -3.92731058642923 | 6.77041738525013 | -0.74623586798588 |
| O | -2.73060664520636 | 4.28673126061757 | -3.37013650911978 |
| H | -3.58767178732018 | 4.31167893388551 | -2.88281466888090 |
| H | -2.66672057262834 | 5.15514243543301 | -3.79235529325978 |

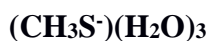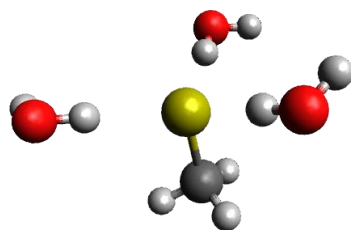

|   |                   |                  |                   |
|---|-------------------|------------------|-------------------|
| S | -4.38893971535454 | 3.72254220123202 | -2.48031590348572 |
| C | -5.49441470470687 | 4.94006436881493 | -1.65252359513326 |
| H | -6.14701381931586 | 5.44873646534933 | -2.38123191722623 |

|   |                   |                  |                   |
|---|-------------------|------------------|-------------------|
| H | -4.91622087808411 | 5.71541562609070 | -1.12401207288785 |
| H | -6.14284573781208 | 4.44287890473702 | -0.91309306981314 |
| O | -5.66223548914588 | 0.98867799704738 | -1.57581936417314 |
| H | -5.24230460050048 | 1.85349551340017 | -1.85436817972541 |
| H | -5.31337443153954 | 0.82324931124759 | -0.68792893189552 |
| O | -4.32030076344394 | 4.76355448257787 | -5.46044691634692 |
| H | -3.42811126066410 | 5.11081542875425 | -5.60492684847174 |
| H | -4.31696869879452 | 4.43740379695694 | -4.51478497784834 |
| O | -1.66157567338481 | 4.16559344571887 | -0.99861569811059 |
| H | -1.29184091262910 | 4.99234076909540 | -1.34150570852094 |
| H | -2.52823331462418 | 4.04696168897753 | -1.48711681636123 |

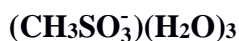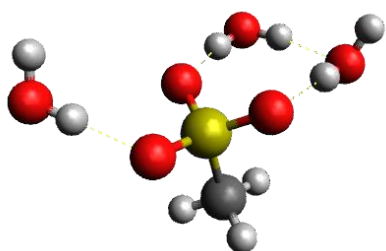

|   |                   |                  |                   |
|---|-------------------|------------------|-------------------|
| S | -6.62204232796195 | 4.49316671750358 | -2.71511408991631 |
| C | -6.81661146188424 | 6.25891107617516 | -2.55686973843039 |
| H | -5.84271694680644 | 6.73445890769893 | -2.73183262429783 |
| H | -7.18147324065479 | 6.47464838560111 | -1.54415971012029 |
| H | -7.54646317227566 | 6.58579974871888 | -3.30777420772357 |
| O | -6.11149372434629 | 4.24349668661041 | -4.10924843150604 |
| O | -5.64737014532983 | 4.04732431552116 | -1.66147784482614 |
| O | -7.98363306615022 | 3.89356825526942 | -2.48946358386847 |
| O | -3.39071476201001 | 5.16935266503812 | -4.38031073112149 |
| H | -4.30137485720712 | 4.80225087164964 | -4.37208792670592 |
| H | -2.88885663234629 | 4.55614055783100 | -4.93735357261126 |
| O | -8.08776768264818 | 2.62564290266084 | 0.03140693469277  |
| H | -8.03710120311102 | 3.04045221655473 | -0.85622319664226 |
| H | -7.59291688405077 | 1.79890575917669 | -0.05919720814392 |
| O | -2.91900490967637 | 4.62206646018541 | -1.57685443791682 |
| H | -3.86598983990669 | 4.38844441247317 | -1.48226160098955 |
| H | -2.86182914363423 | 4.85006006133155 | -2.52642802987250 |

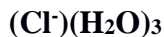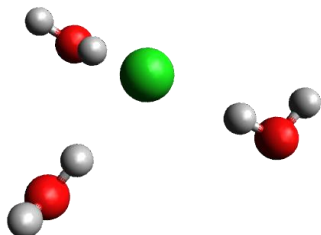

|    |                    |                  |                   |
|----|--------------------|------------------|-------------------|
| Cl | -11.25155303707423 | 3.77568666208321 | -2.61404852701254 |
| O  | -8.38947527218013  | 4.35803942606183 | -1.33159582159081 |
| H  | -8.38624901317943  | 3.97947670367596 | -0.44070922807727 |
| H  | -9.28061486038066  | 4.14663491967775 | -1.68729893983781 |
| O  | -11.64166875256275 | 6.55892032276759 | -1.18902752545013 |
| H  | -11.55206755191122 | 5.68053436798098 | -1.62220982141844 |
| H  | -12.53213471752042 | 6.55187270651578 | -0.80867846854658 |
| O  | -11.04671099362832 | 4.69733003141787 | -5.66671138982821 |
| H  | -11.10464235331450 | 4.38087566426770 | -4.73692584326210 |
| H  | -10.71121344824845 | 3.93257919555134 | -6.15663443497612 |

**(CN<sup>-</sup>)(H<sub>2</sub>O)<sub>3</sub>**

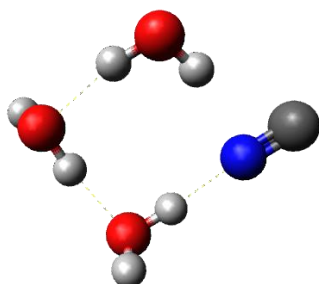

|   |                   |                  |                   |
|---|-------------------|------------------|-------------------|
| C | -7.49546834324075 | 1.95107631301092 | 0.58372959926723  |
| N | -6.38372256894878 | 2.24527101794409 | 0.33623913107797  |
| O | -2.68538029980421 | 1.44670501616281 | 1.63719455932301  |
| H | -3.00591998687933 | 1.97271203273700 | 0.86411364667227  |
| H | -2.31380451464725 | 0.63837818584571 | 1.25299359727306  |
| O | -5.18410163854587 | 1.03881504476874 | 2.92136617778390  |
| H | -5.74299238281104 | 1.36320444089229 | 2.19216334169326  |
| H | -4.27608403847240 | 1.09714727366159 | 2.54867498076689  |
| O | -3.81933586187918 | 2.98284682397459 | -0.34731432297666 |
| H | -3.69722131993662 | 3.89410103161458 | -0.04167543374205 |
| H | -4.76000904483463 | 2.75779281938767 | -0.11047527713886 |

**(EtO<sup>-</sup>)(H<sub>2</sub>O)<sub>3</sub>**

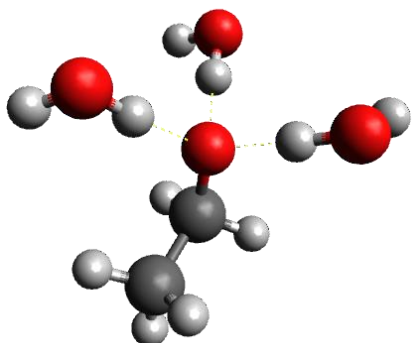

|   |                   |                  |                  |
|---|-------------------|------------------|------------------|
| C | -6.63779659567878 | 1.15644594487154 | 0.70619041362520 |
| C | -5.53358772145329 | 2.20576574015674 | 0.78414413485268 |

|   |                   |                   |                   |
|---|-------------------|-------------------|-------------------|
| H | -6.69670759881489 | 0.71121160689935  | -0.30183613905608 |
| H | -7.61829071139958 | 1.60767411392152  | 0.93780365669426  |
| H | -6.46382119284458 | 0.33757863072434  | 1.42392943730606  |
| O | -4.25207916507236 | 1.69413236460220  | 0.51641076936318  |
| H | -5.56390603016875 | 2.66966473717992  | 1.79488299787103  |
| H | -5.78025846860524 | 3.02690286005199  | 0.07637374136770  |
| O | -2.39458382908258 | 3.10245182440163  | 1.62954540902393  |
| H | -2.66223565604879 | 3.22493608024757  | 2.55090373870803  |
| H | -3.14328717167666 | 2.54848060021828  | 1.20470390699385  |
| O | -3.49031190170242 | -0.61684369843070 | 1.42265754273137  |
| H | -3.83434132105097 | 0.28715196283556  | 1.10131785245510  |
| H | -3.96162593025927 | -0.78398501331618 | 2.25008894073706  |
| O | -3.43145976995552 | 1.97523814764442  | -1.90304633714519 |
| H | -3.15476056160366 | 2.89978867315885  | -1.97311189843156 |
| H | -3.77653637458266 | 1.87368542483296  | -0.94261816709663 |

**(F<sup>-</sup>)(H<sub>2</sub>O)<sub>3</sub>**

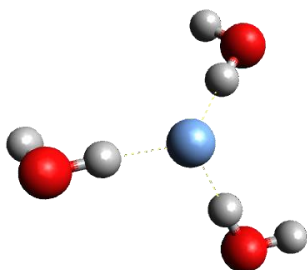

|   |                    |                  |                   |
|---|--------------------|------------------|-------------------|
| F | -10.38909158934325 | 5.40540317918599 | -2.85640554162203 |
| O | -8.99396864717975  | 4.61699599691236 | -0.82196721072093 |
| H | -8.57507001922614  | 3.77897831970048 | -1.06484758657963 |
| H | -9.50778597975671  | 4.89104151534633 | -1.63244915703403 |
| O | -12.77120513506022 | 5.45538271925061 | -1.89742603648145 |
| H | -11.83902943656642 | 5.44663692701410 | -2.25923467484867 |
| H | -12.69046024119872 | 5.85856995580655 | -1.02185977663527 |
| O | -10.51496831287641 | 4.38118660421137 | -5.22940471938768 |
| H | -10.44332377490413 | 4.74873907350685 | -4.30407075627196 |
| H | -10.17141686388788 | 3.47899570906523 | -5.16617454041828 |

**(HCC<sup>-</sup>)(H<sub>2</sub>O)<sub>3</sub>**

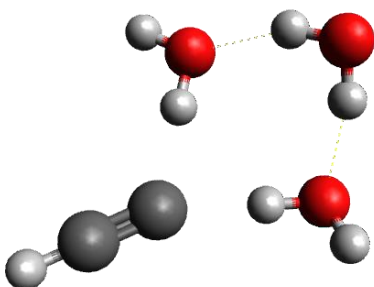

|   |                   |                  |                  |
|---|-------------------|------------------|------------------|
| C | -8.97693446253494 | 2.15205377657071 | 0.45104732955626 |
|---|-------------------|------------------|------------------|

|   |                   |                  |                   |
|---|-------------------|------------------|-------------------|
| C | -7.93532349940818 | 2.55588283758007 | -0.07609608251855 |
| H | -9.88750260903354 | 1.80382306087221 | 0.91372635348847  |
| O | -3.79244956417411 | 3.38698124302751 | -0.17790035662619 |
| H | -4.42013006726169 | 3.83509778355156 | 0.42344800545778  |
| H | -4.38509775741453 | 3.07251384118754 | -0.89821150718491 |
| O | -5.79425800690514 | 2.66724175415427 | -1.98591010746828 |
| H | -5.73587288310512 | 1.76866325906591 | -2.34276391918102 |
| H | -6.55530125983320 | 2.62952995945667 | -1.31970262084513 |
| O | -6.09044152483520 | 4.38197667418603 | 1.06293463006570  |
| H | -6.56232933036734 | 4.84672555570275 | 1.76818110944442  |
| H | -6.75824903512701 | 3.76342025464475 | 0.64503716581141  |

**(HCOO<sup>-</sup>)(H<sub>2</sub>O)<sub>3</sub>**

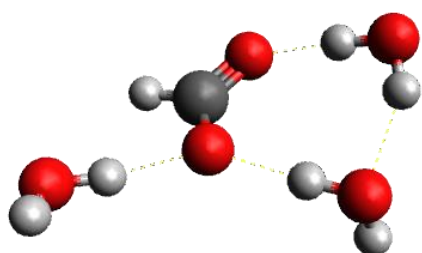

|   |                   |                   |                  |
|---|-------------------|-------------------|------------------|
| C | -3.92389024713348 | 2.38145390616143  | 2.00805400143315 |
| O | -3.88179619929248 | 1.11579345199405  | 1.97957565274285 |
| O | -2.95554309531335 | 3.16936595183957  | 1.89954831632429 |
| H | -4.93127769839281 | 2.84220727153438  | 2.14854485293553 |
| O | -1.57998732518967 | -0.08048525838165 | 1.00657254583659 |
| H | -1.72226506480796 | -0.22609559188060 | 0.06025135223353 |
| H | -2.42057406543205 | 0.32887015696915  | 1.33368612345426 |
| O | -0.35635848434812 | 2.36552944677444  | 1.86624015388470 |
| H | -1.28385970571723 | 2.70852079833155  | 1.89386975691300 |
| H | -0.49265003479012 | 1.47196762682786  | 1.49374437378979 |
| O | -6.37701184694103 | 0.52537062522174  | 2.98438885315945 |
| H | -5.46602474930407 | 0.62238234050418  | 2.61348517011502 |
| H | -6.40103148333766 | -0.37550072589609 | 3.33698884717778 |

**(HO<sub>2</sub>)(H<sub>2</sub>O)<sub>3</sub>**

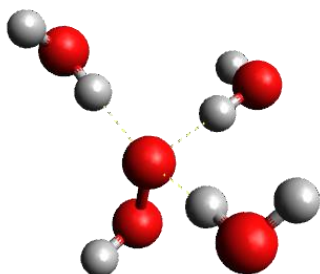

|   |                    |                   |                  |
|---|--------------------|-------------------|------------------|
| O | -10.64061565451514 | -1.93035487727876 | 3.66917083718877 |
| O | -9.27968344511187  | -1.49171395695747 | 3.35666318959590 |

|   |                    |                   |                  |
|---|--------------------|-------------------|------------------|
| H | -10.95923663708543 | -1.22662753324471 | 4.25620803838652 |
| O | -9.44939994276350  | -0.35131439414589 | 0.97623422986429 |
| H | -9.38355294819119  | -0.74479144649243 | 1.89901853703129 |
| H | -9.05363173227480  | 0.52764205514357  | 1.05412750005630 |
| O | -8.26502476293300  | -3.52090523499993 | 2.00325284299764 |
| H | -8.73527082269609  | -3.54536733293071 | 1.15830968115236 |
| H | -8.67264246771516  | -2.75407168538162 | 2.50877927169132 |
| O | -8.02360951260690  | -1.94044389663413 | 5.60391565563234 |
| H | -7.15876391560723  | -2.31092047486471 | 5.37692599106180 |
| H | -8.47625815849957  | -1.77198122221317 | 4.71734422534151 |

**(HS<sup>-</sup>)(H<sub>2</sub>O)<sub>3</sub>**

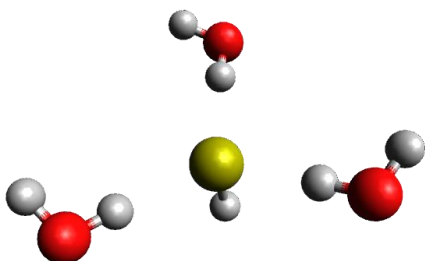

|   |                    |                   |                   |
|---|--------------------|-------------------|-------------------|
| S | -10.52467057092258 | -1.78631264744038 | 3.46507286992164  |
| H | -11.32025686487137 | -0.93306966856223 | 4.15050414238964  |
| O | -11.83537843029713 | -4.53635109568685 | 4.39523709421266  |
| H | -12.24532157721253 | -4.91397057092605 | 3.60360078994599  |
| H | -11.43113537762730 | -3.68010145862352 | 4.08423426035437  |
| O | -7.78249746485333  | -1.25053939329912 | 4.92988388650002  |
| H | -7.63381750323234  | -2.02139275744235 | 5.49617829363574  |
| H | -8.65088027872225  | -1.43478517729933 | 4.47428741332381  |
| O | -10.75521671360166 | -0.46617834035501 | 0.56328929200573  |
| H | -11.07036075541714 | -1.16744989034720 | -0.02463025036255 |
| H | -10.68003446324242 | -0.90099900001795 | 1.45581220807294  |

**(I<sup>-</sup>)(H<sub>2</sub>O)<sub>3</sub>**

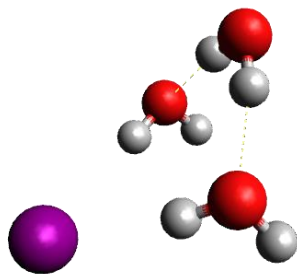

|   |                    |                  |                   |
|---|--------------------|------------------|-------------------|
| I | -10.86622402091261 | 4.41355290815616 | -2.99599184442490 |
| O | -9.19231186374727  | 4.18566934248060 | 0.23266083812362  |
| H | -9.68643132251170  | 3.52134991333336 | 0.73613812911982  |
| H | -9.62812856451281  | 4.19195658403527 | -0.64369348664453 |
| O | -12.39817266505007 | 6.22659346782036 | -0.26585572552305 |
| H | -12.08009983407406 | 5.70789820354436 | -1.03221254486525 |

|   |                    |                  |                  |
|---|--------------------|------------------|------------------|
| H | -13.10673597300196 | 5.68642592644825 | 0.11500665785456 |
| O | -10.04678448757693 | 6.72678388888316 | 1.20236513524150 |
| H | -9.62522963651442  | 5.88263332476646 | 0.93703442245912 |
| H | -10.92595163209812 | 6.66060644053204 | 0.77185841865914 |

**(MeO<sup>-</sup>)(H<sub>2</sub>O)<sub>3</sub>**

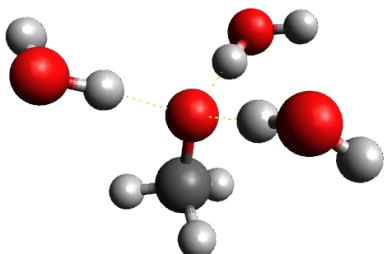

|   |                   |                  |                   |
|---|-------------------|------------------|-------------------|
| C | -4.54168461148800 | 0.58630639887765 | 2.89768217887102  |
| O | -4.74750209733956 | 1.97453476295318 | 2.83379193447842  |
| H | -4.16668501738316 | 0.16742171265564 | 1.93948865348174  |
| H | -5.47241437255029 | 0.03450643470738 | 3.14728573065796  |
| H | -3.79704512753063 | 0.30890411526946 | 3.67246885264622  |
| O | -6.96565402290023 | 2.51911603591389 | 4.02545449298355  |
| H | -6.08490489851677 | 2.32131722410279 | 3.54116680372877  |
| H | -7.60472645669426 | 2.68593528164941 | 3.31860849884541  |
| O | -2.57495994251903 | 3.01212870348256 | 3.76751890941539  |
| H | -2.77260053395137 | 3.30898394765060 | 4.66610397897411  |
| H | -3.45546512924019 | 2.63480549568587 | 3.40956612218154  |
| O | -5.06054123049893 | 2.84877148187707 | 0.38501341304410  |
| H | -4.94884876213083 | 2.49057705518475 | 1.33178836359318  |
| H | -5.67564779725673 | 2.23943134998971 | -0.04610793290139 |

**(N<sub>3</sub><sup>-</sup>)(H<sub>2</sub>O)<sub>3</sub>**

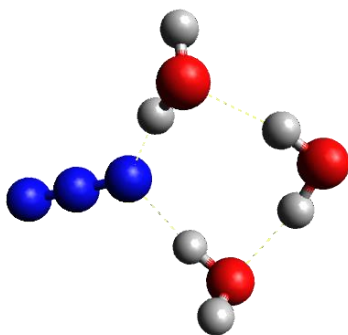

|   |                   |                   |                   |
|---|-------------------|-------------------|-------------------|
| N | -5.00761739500467 | -0.46450777504920 | 0.62954161429841  |
| N | -4.68888452614202 | -1.25165459533367 | 1.46131329547019  |
| N | -5.31992907155231 | 0.31417189485806  | -0.18288562918989 |
| O | -2.10472293370827 | -1.66788599254555 | 2.37997311713471  |
| H | -2.99834470099369 | -1.47088787460503 | 1.98960761821589  |
| H | -1.62532289861790 | -2.12741336515225 | 1.67507076260597  |
| O | -5.31350085921388 | -3.88383032910915 | 2.13110531441281  |
| H | -5.20221714620933 | -2.94630965784737 | 1.82702236845457  |

|   |                   |                   |                  |
|---|-------------------|-------------------|------------------|
| H | -6.22513454592122 | -3.93055634382181 | 2.45553313600877 |
| O | -3.28197186457618 | -3.57197120767061 | 4.08796029497726 |
| H | -2.76407905259420 | -2.91472132216150 | 3.57489936922168 |
| H | -4.03778500546635 | -3.77328343156180 | 3.49552873838963 |

**(OBr<sup>-</sup>)(H<sub>2</sub>O)<sub>3</sub>**

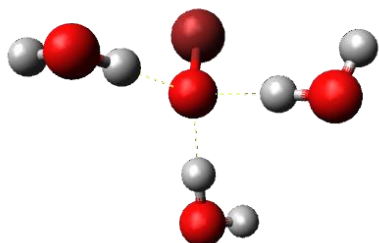

|    |                   |                   |                   |
|----|-------------------|-------------------|-------------------|
| O  | -5.01163256994430 | 1.42790584977747  | -1.60070937690896 |
| Br | -5.19846937244847 | 0.22165198255811  | -0.20752232057982 |
| O  | -3.95122791860887 | 0.24243511736950  | -3.69938221346176 |
| H  | -4.33883038956612 | 0.65451633531521  | -2.86692683009362 |
| H  | -4.50824051379589 | -0.52731152808681 | -3.88029841103402 |
| O  | -7.37640639021226 | 1.66215458471507  | -2.75360228166352 |
| H  | -6.48925936488350 | 1.55805635574780  | -2.28928078103635 |
| H  | -8.03369791758694 | 1.40477572909373  | -2.09217863910087 |
| O  | -3.99316690079002 | 3.68401387399417  | -0.75857446050324 |
| H  | -3.11929419708027 | 3.47399891484801  | -0.40135998148956 |
| H  | -4.37895446508339 | 2.79539278466772  | -1.04102470412825 |

**(OCl<sup>-</sup>)(H<sub>2</sub>O)<sub>3</sub>**

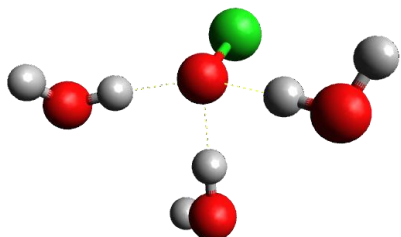

|    |                   |                  |                   |
|----|-------------------|------------------|-------------------|
| O  | -5.41015064568283 | 1.54110265066635 | -1.34918902607993 |
| Cl | -5.35633169873088 | 0.11830510023171 | -0.37085680714596 |
| O  | -4.39485010748139 | 0.85180209000065 | -3.72127140279970 |
| H  | -4.76909916330025 | 1.08636402937808 | -2.82432466267060 |
| H  | -3.49087539605238 | 0.55535356641374 | -3.54712005599820 |
| O  | -7.72949015117810 | 1.43030384071352 | -2.63716038137348 |
| H  | -6.87215575684055 | 1.46875157753401 | -2.12001392646034 |
| H  | -8.40607182583233 | 1.22095591264911 | -1.97780625694169 |
| O  | -2.98135115002123 | 2.60241310609655 | -1.13057181848357 |
| H  | -3.07660838757597 | 3.48380359979441 | -0.74361092262460 |
| H  | -3.91218571730425 | 2.23845452652207 | -1.16892473942244 |



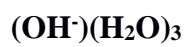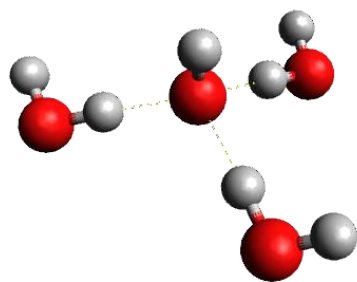

|   |                   |                   |                   |
|---|-------------------|-------------------|-------------------|
| O | -5.12759615287669 | 1.38353645481436  | -1.59537620534519 |
| H | -5.28168241196719 | 0.72596703555249  | -0.90146136807422 |
| O | -4.23029163866502 | 0.22086617310764  | -3.74925940513764 |
| H | -4.54923913268738 | 0.65174695554059  | -2.88370578615003 |
| H | -3.36128671661178 | -0.14790049361634 | -3.53918486325734 |
| O | -7.49486941860959 | 1.93754141193683  | -2.66004226057477 |
| H | -6.60053807487493 | 1.70211733085750  | -2.24523326762148 |
| H | -7.92142666527120 | 1.08778576923984  | -2.83678854257933 |
| O | -4.14548836909332 | 3.54650005420921  | -0.53534785547771 |
| H | -3.27718589101234 | 3.30954418323147  | -0.18076493871530 |
| H | -4.51004552832985 | 2.67979512512666  | -0.93036550706734 |

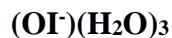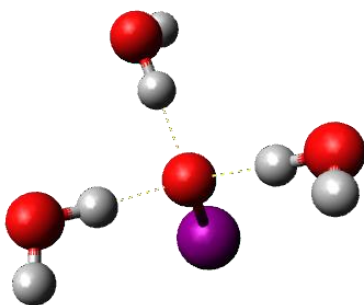

|   |                   |                   |                   |
|---|-------------------|-------------------|-------------------|
| O | -5.07739535971080 | 1.14047478454800  | -1.63481197184759 |
| I | -5.28156260528699 | -0.00824576459638 | 0.01779128601736  |
| O | -4.26738990555921 | -0.18452118883270 | -3.76022744056566 |
| H | -4.56627066668739 | 0.29765450356127  | -2.92679669840580 |
| H | -3.34617539987675 | 0.08894386141703  | -3.87417150238710 |
| O | -7.35096621502676 | 2.26825171613808  | -2.40538964399667 |
| H | -6.51146983589699 | 1.81372533724559  | -2.08954758953061 |
| H | -8.06287048321717 | 1.66065051189286  | -2.15868954061554 |
| O | -4.17006808119926 | 3.52155242611756  | -0.96127560261759 |
| H | -3.28156694703838 | 3.40362221860723  | -0.59853449722666 |
| H | -4.48343450050032 | 2.59550159390141  | -1.19919679882417 |

**(PH<sub>2</sub>)(H<sub>2</sub>O)<sub>3</sub>**

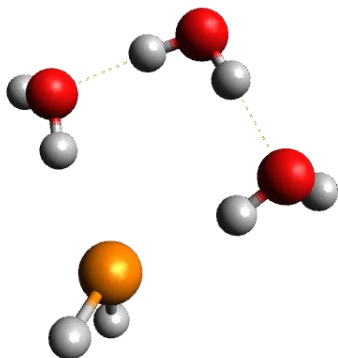

|   |                   |                   |                   |
|---|-------------------|-------------------|-------------------|
| P | -4.67092801414171 | -2.57903278107940 | -0.38805772259646 |
| H | -4.73387825742638 | -3.81785764027117 | 0.32509784303379  |
| H | -4.75414839388586 | -3.19191173550058 | -1.67890781608110 |
| O | -2.47795744071870 | -0.28307387887160 | 0.31256580351249  |
| H | -1.69608017251460 | -0.58945941787710 | 0.79536203521117  |
| H | -2.97915954871806 | -1.10965500422922 | 0.07724907748568  |
| O | -4.48731827346663 | 1.43052272037080  | 1.19943859778606  |
| H | -3.73272181395369 | 0.85741444328085  | 0.94007955448142  |
| H | -5.28169658009564 | 0.92903814198118  | 0.91714282654062  |
| O | -6.74544468818590 | -0.11573681188030 | 0.36723670437944  |
| H | -6.25872023984489 | -0.94631641706819 | 0.11719829649745  |
| H | -7.25655657704792 | -0.36502161885528 | 1.15224479974945  |

**(PhCOCH<sub>2</sub>)(H<sub>2</sub>O)<sub>3</sub>**

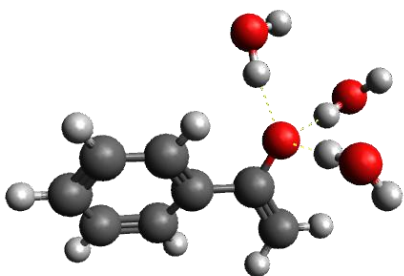

|   |                   |                   |                   |
|---|-------------------|-------------------|-------------------|
| H | -3.07555313442020 | -1.50410641788436 | 3.34446357780956  |
| C | -3.51362586120853 | -2.14559705870627 | 2.57765654263278  |
| C | -4.51927819020741 | -3.06875851801379 | 2.92908346509062  |
| C | -5.07858553871335 | -3.85716085941060 | 1.90665790667262  |
| H | -5.85812164796044 | -4.57793591704074 | 2.16090143973443  |
| C | -4.64330431873261 | -3.73605169869385 | 0.58337516959284  |
| H | -5.08865478460942 | -4.36481953282780 | -0.19166693975034 |
| C | -3.64528421084759 | -2.81441714826246 | 0.25090274314657  |
| H | -3.30476187857328 | -2.71254891257472 | -0.78281319732150 |
| C | -3.08094967910637 | -2.02025542705095 | 1.25582502230211  |
| H | -2.30217915023131 | -1.29500773194514 | 1.00477610379354  |
| C | -5.00054722849759 | -3.23151792568447 | 4.34373425347899  |

|   |                   |                   |                  |
|---|-------------------|-------------------|------------------|
| O | -6.22674251478814 | -3.73095583340662 | 4.49413071947820 |
| C | -4.19573156881394 | -2.92447762457693 | 5.39496556195810 |
| H | -3.17778965959968 | -2.55843284896089 | 5.25441066274907 |
| H | -4.55669385916894 | -3.05597155108027 | 6.41926903448364 |
| O | -6.00582330425229 | -6.21471368124119 | 5.37346162497767 |
| H | -5.53653171794956 | -6.15254269137046 | 6.21682127035191 |
| H | -6.09382217439890 | -5.26719267110816 | 5.05587334479876 |
| O | -8.47279282796517 | -3.35907707879373 | 3.10885493708897 |
| H | -9.01915913005509 | -3.06220331215384 | 3.85095024914872 |
| H | -7.57407850653542 | -3.50295511247701 | 3.52398174845472 |
| O | -7.94682608920305 | -2.82468087868694 | 6.33505556882364 |
| H | -8.42447115801096 | -3.61399914591794 | 6.62607509226726 |
| H | -7.24601186615088 | -3.16444042213081 | 5.70714409823702 |

(PhCOO<sup>-</sup>)(H<sub>2</sub>O)<sub>3</sub>

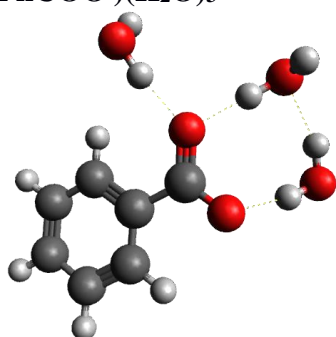

|   |                   |                   |                  |
|---|-------------------|-------------------|------------------|
| H | -2.72981444106177 | -3.81655083699756 | 3.36438557242670 |
| C | -3.53621349428071 | -3.29616922857039 | 2.84539355277768 |
| C | -4.86666222886265 | -3.63522329779181 | 3.14396667199948 |
| C | -5.90411486570917 | -2.95951947186679 | 2.48193770700097 |
| H | -6.94033061972801 | -3.20666674737859 | 2.71473195771209 |
| C | -5.61768031757670 | -1.97142522764327 | 1.53643708447444 |
| H | -6.43385909388257 | -1.45271114187555 | 1.02882559032632 |
| C | -4.29006201454944 | -1.64367011453557 | 1.24264502140254 |
| H | -4.06404988448239 | -0.86956199698716 | 0.50473426109319 |
| C | -3.24913500523656 | -2.30774760114617 | 1.90069349007837 |
| H | -2.21172427405005 | -2.04827229346788 | 1.67432139199565 |
| C | -5.16231710034093 | -4.70209162225837 | 4.17559560136582 |
| O | -6.37828758346545 | -5.01941151030924 | 4.38404743266495 |
| O | -4.19119807171503 | -5.22174742676018 | 4.78698523194445 |
| O | -4.49081371577476 | -5.37685735840928 | 7.51830953145447 |
| H | -4.28870568497129 | -5.33223174622654 | 6.55362428327334 |
| H | -5.41279021680250 | -5.70363959064841 | 7.50751289875860 |
| O | -8.76221086552214 | -5.09012794855639 | 3.05220506334839 |
| H | -7.88195722174962 | -5.00442524333288 | 3.49148625020814 |
| H | -9.37954914496674 | -4.67565439013161 | 3.67119720635588 |
| O | -7.09681268000214 | -6.22602946822188 | 6.69024541154211 |

|   |                   |                   |                  |
|---|-------------------|-------------------|------------------|
| H | -7.09938577954045 | -7.18559390491762 | 6.57330326757386 |
| H | -6.82857569572882 | -5.84899183196694 | 5.80763552022266 |

**(PhNH<sup>-</sup>)(H<sub>2</sub>O)<sub>3</sub>**

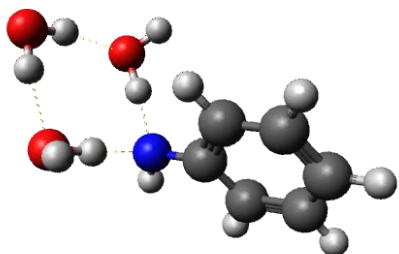

|   |                   |                   |                  |
|---|-------------------|-------------------|------------------|
| H | -2.92161114662154 | -3.13374882584156 | 3.79309108874929 |
| C | -3.59421767832188 | -2.81215781311636 | 2.99089280116397 |
| C | -4.93034029728655 | -3.30716135999065 | 2.98496623857278 |
| C | -5.75478663804296 | -2.85827532172414 | 1.91253473180328 |
| H | -6.78786411768473 | -3.21519708551252 | 1.86281491294541 |
| C | -5.28041526961515 | -1.97982548643055 | 0.93790238909154 |
| H | -5.95508296935850 | -1.65941858386885 | 0.13767778718625 |
| C | -3.96353725838587 | -1.49859903270687 | 0.97206678078324 |
| H | -3.59612262881925 | -0.80753644001797 | 0.20923550196102 |
| C | -3.13142646558119 | -1.93040091263727 | 2.01414802241178 |
| H | -2.10025477146340 | -1.56748275778597 | 2.06992402474027 |
| N | -5.42797915992591 | -4.16226526642980 | 3.94414380650555 |
| H | -4.70493433694338 | -4.34935669420161 | 4.64258169684272 |
| O | -6.52961822290881 | -6.44416210748555 | 3.14687795281910 |
| H | -6.32422934855385 | -6.56203395083222 | 2.20843421051543 |
| H | -6.08158965468701 | -5.54478626152709 | 3.41997548856908 |
| O | -7.78274985558993 | -3.48346541443184 | 4.96338920619618 |
| H | -8.02509913474608 | -2.64734366895635 | 4.54009157239753 |
| H | -6.85075391811911 | -3.72894227699762 | 4.56615901563244 |
| O | -9.10136672915641 | -5.71958750380689 | 3.89855797794311 |
| H | -8.26013298629166 | -6.10060642734739 | 3.55326513815663 |
| H | -8.78554741189687 | -4.87944680835086 | 4.30480965501337 |

**(PhO<sup>-</sup>)(H<sub>2</sub>O)<sub>3</sub>**

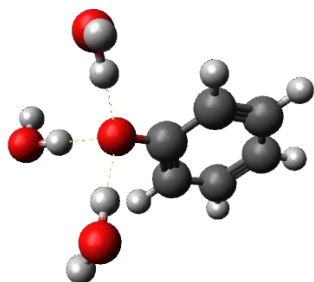

|   |                   |                   |                  |
|---|-------------------|-------------------|------------------|
| H | -3.75414144514597 | -1.97087874781013 | 4.19962771144924 |
|---|-------------------|-------------------|------------------|

|   |                   |                   |                   |
|---|-------------------|-------------------|-------------------|
| C | -4.04660940162496 | -2.11093395288151 | 3.15554347553471  |
| C | -5.03387344492663 | -3.08068506442007 | 2.84183545841066  |
| C | -5.38625673578493 | -3.23159656930048 | 1.47690601465836  |
| H | -6.14916162299262 | -3.96879011263958 | 1.21033894265727  |
| C | -4.76731566247380 | -2.46918955802977 | 0.48443928793025  |
| H | -5.06008621931942 | -2.61889682854302 | -0.55945952697933 |
| C | -3.78510326524123 | -1.52421636152574 | 0.80965342070098  |
| H | -3.29912276889366 | -0.93321838161126 | 0.03031695163157  |
| C | -3.43488580223427 | -1.35324056300293 | 2.15505487845906  |
| H | -2.66824525950506 | -0.62326148755119 | 2.43326891965438  |
| O | -5.59324939494276 | -3.83886435499969 | 3.78470536416627  |
| O | -5.38327985565495 | -3.04880873469832 | 6.31956565118982  |
| H | -4.64454470195407 | -3.54524057269523 | 6.69881457017508  |
| H | -5.42893192465946 | -3.34831606184726 | 5.36182649235661  |
| O | -4.60816167626007 | -6.32539455310239 | 3.45617553203960  |
| H | -5.01206053668752 | -5.41977639784894 | 3.57404865066382  |
| H | -5.19566870307390 | -6.78496738049392 | 2.83997222535098  |
| O | -8.20825621153481 | -4.48457869845413 | 3.63815907132831  |
| H | -7.24378655475845 | -4.21908595354454 | 3.64856241342160  |
| H | -8.69323881233131 | -3.64823966499987 | 3.61039449520070  |

**(PhS)(H<sub>2</sub>O)<sub>3</sub>**

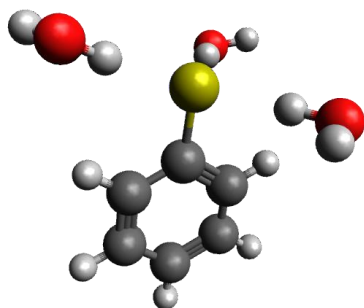

|   |                   |                  |                   |
|---|-------------------|------------------|-------------------|
| S | -4.12098185491584 | 3.85017883874747 | -2.44830198666218 |
| O | -5.29350956264534 | 0.97496133323472 | -1.63386967223306 |
| H | -4.91105172264271 | 1.85431153356245 | -1.89092028237223 |
| H | -4.97206589696972 | 0.82785678140123 | -0.73219212988931 |
| O | -4.93521463053904 | 4.84215230524361 | -5.39907911580118 |
| H | -5.31454523790504 | 4.06694523671153 | -5.83759894847367 |
| H | -4.64829350473783 | 4.51058171339675 | -4.50951398554469 |
| O | -1.38888420180573 | 4.54033588213392 | -0.96750888536057 |
| H | -1.05529834444927 | 5.37489882606257 | -1.32834043880609 |
| H | -2.25944841314730 | 4.39546698977079 | -1.42333816712369 |
| C | -5.45205880223058 | 4.78135599200507 | -1.72506172667793 |
| C | -6.79074694603716 | 4.48969106604165 | -2.06899180226746 |
| H | -6.99255418748342 | 3.68511423195916 | -2.78066552343987 |
| C | -7.85447317045937 | 5.20527494160882 | -1.51628469148203 |
| H | -8.87667059658084 | 4.94774221668303 | -1.80908817513313 |
| C | -7.61695902528553 | 6.23916638422624 | -0.60149048971271 |

|   |                   |                  |                   |
|---|-------------------|------------------|-------------------|
| H | -8.44733286418114 | 6.80161438226681 | -0.16861270853250 |
| C | -6.29660389604720 | 6.54573219693748 | -0.25457699679457 |
| H | -6.08831956040748 | 7.35514191254916 | 0.45139088527076  |
| C | -5.22908568002286 | 5.83038673197530 | -0.80735490327852 |
| H | -4.20639190150647 | 6.09013050348222 | -0.52144025568544 |

**(TerBuO<sup>-</sup>)(H<sub>2</sub>O)<sub>3</sub>**

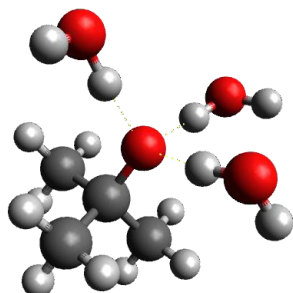

|   |                   |                   |                   |
|---|-------------------|-------------------|-------------------|
| C | -4.86687185683743 | -1.82918573727164 | -0.20154071259414 |
| C | -6.39804912126276 | -1.94402505445497 | -0.30627120572772 |
| H | -6.69996448749894 | -2.63352975411004 | -1.11117568443747 |
| H | -6.85237360755186 | -0.96160430014599 | -0.51780154323517 |
| H | -6.82717157100091 | -2.32449172618912 | 0.63464975315820  |
| C | -4.27475387089046 | -3.22152874461590 | 0.08679805002372  |
| H | -4.67291409758882 | -3.61813346518377 | 1.03539152976683  |
| H | -3.17745401939535 | -3.16800362176686 | 0.17469801340106  |
| H | -4.51738007547781 | -3.94634284629959 | -0.70777165927880 |
| C | -4.30941345631144 | -1.29661067005311 | -1.53410522045198 |
| H | -4.55886960655324 | -1.96305960241249 | -2.37658278709083 |
| H | -3.21224552640289 | -1.20054886537912 | -1.48777452261797 |
| H | -4.72899168369627 | -0.30205018690626 | -1.75809943884491 |
| O | -4.51945502963852 | -0.94134071212457 | 0.84890055472782  |
| O | -5.20475462896283 | 1.54504527422110  | 0.73865575740188  |
| H | -4.96049995533728 | 0.54900040136252  | 0.72297447897753  |
| H | -6.11586621484990 | 1.58546881116155  | 0.41779716754336  |
| O | -5.75679569095008 | -1.10224759878785 | 3.12420243659402  |
| H | -6.17373868285192 | -0.23327910416176 | 3.20390869980175  |
| H | -5.29841923295446 | -1.08654265726127 | 2.20985903085272  |
| O | -2.08144702513632 | -0.75262442204495 | 1.65275771144481  |
| H | -1.58500735716816 | -0.36078913046959 | 0.92118870171120  |
| H | -3.03815320168226 | -0.85970628710634 | 1.29066088887409  |

## CATIONS

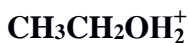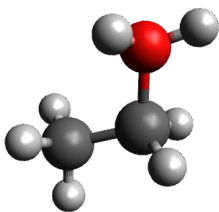

|   |                    |                  |                   |
|---|--------------------|------------------|-------------------|
| C | -10.45516705288023 | 2.92293997425734 | -0.04172043391443 |
| C | -9.05983939158388  | 2.37938013235377 | 0.03945517624366  |
| H | -11.13519508629352 | 2.17452749607902 | 0.39169072636123  |
| H | -10.75753338693025 | 3.11161256785572 | -1.08201463030959 |
| H | -10.55915900447394 | 3.84859354146941 | 0.54487671226037  |
| O | -8.11959898572827  | 3.41623538464697 | -0.50331005838429 |
| H | -8.88286460712867  | 1.51608696818334 | -0.61042990792570 |
| H | -8.72627743622816  | 2.16472803328408 | 1.06199338657911  |
| H | -7.19332652068518  | 3.10265898724842 | -0.54266862631991 |
| H | -8.12248852806789  | 4.24594691462193 | 0.01734765540957  |

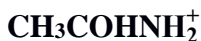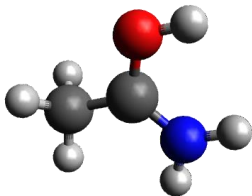

|   |                  |                   |                   |
|---|------------------|-------------------|-------------------|
| C | 1.77724823073223 | 1.65456227180120  | -0.85524904863996 |
| O | 3.00377028389951 | 1.57991884311012  | -0.41927008177134 |
| N | 1.23434073124181 | 2.79566146555194  | -1.16795445765022 |
| H | 0.27966499737492 | 2.82412747160261  | -1.52135657949368 |
| H | 1.73950710638273 | 3.67922240174882  | -1.09522211412693 |
| H | 3.44509681851541 | 2.44701509721652  | -0.34164616422910 |
| C | 1.03843951906809 | 0.37729835545113  | -0.96030998508748 |
| H | 0.08615378507181 | 0.50319521082494  | -1.48742901657995 |
| H | 0.84807478716140 | 0.00564952427579  | 0.05970948612059  |
| H | 1.66860374055207 | -0.36257064158306 | -1.47391203854194 |

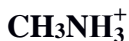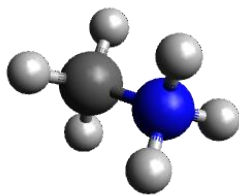

|   |                   |                  |                   |
|---|-------------------|------------------|-------------------|
| C | -9.00802654592665 | 3.01691422800551 | -0.33884499966076 |
|---|-------------------|------------------|-------------------|

|   |                   |                  |                   |
|---|-------------------|------------------|-------------------|
| N | -8.04757806319765 | 2.42902033517660 | 0.62842083759358  |
| H | -7.23224260438094 | 3.03762922548504 | 0.76939593312967  |
| H | -8.48355716859207 | 2.27931322730428 | 1.54671544771675  |
| H | -7.69690322871953 | 1.51949135459374 | 0.30286769255360  |
| H | -9.36798596459710 | 3.97239754975615 | 0.05888844176704  |
| H | -9.84638601336512 | 2.32445472418954 | -0.46979113512121 |
| H | -8.49298041122094 | 3.17275935548915 | -1.29342221797868 |

### CH<sub>3</sub>OH<sub>2</sub><sup>+</sup>

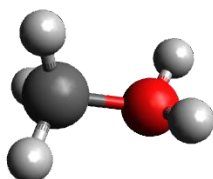

|   |                    |                  |                   |
|---|--------------------|------------------|-------------------|
| C | -10.39090787591007 | 3.08232621377786 | 0.02136318795034  |
| O | -8.92508382727869  | 2.93002804910666 | 0.00937049859023  |
| H | -10.79471723438174 | 2.06752689820732 | -0.03756709776401 |
| H | -10.69489855991203 | 3.69750447635962 | -0.83197818810586 |
| H | -10.63369145910420 | 3.55469853645356 | 0.97764495702938  |
| H | -8.595367444462740 | 2.49893601389890 | -0.80530583230056 |
| H | -8.45324359878587  | 3.78226981219609 | 0.10367247460048  |

### CH<sub>3</sub>SOCH<sub>3</sub>H<sup>+</sup>

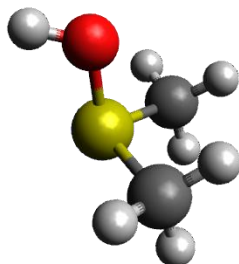

|   |                   |                  |                  |
|---|-------------------|------------------|------------------|
| S | 0.30768695120301  | 6.38453560689891 | 3.36018848277294 |
| O | 0.01121594897355  | 6.21482936618238 | 1.75653008246077 |
| C | 0.60173142949261  | 8.14353455185167 | 3.44806521282883 |
| C | -1.33534194403003 | 6.24564651112279 | 4.05289571017155 |
| H | 1.54949006302032  | 8.34162494281138 | 2.93067849836553 |
| H | 0.69059786216213  | 8.38747566340435 | 4.51725841362248 |
| H | -0.23900463393251 | 8.67767315781971 | 2.98609069594656 |
| H | -1.64861927995900 | 5.19830067336529 | 3.94798134007118 |
| H | -2.01348424350670 | 6.93363604233958 | 3.53146210652294 |
| H | -1.24267405324889 | 6.50965297920053 | 5.11826499036476 |
| H | 0.49979189982551  | 5.43926050500342 | 1.41627446687247 |



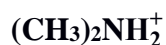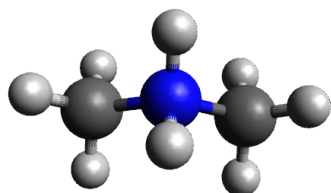

|   |                   |                  |                   |
|---|-------------------|------------------|-------------------|
| C | -8.90873170040300 | 2.98828243242455 | -0.19298018145455 |
| N | -7.66667177422674 | 2.82348967860982 | 0.60785227176757  |
| H | -8.68841649582079 | 3.62406803061630 | -1.05814813508148 |
| H | -9.67431168845313 | 3.45822375906037 | 0.43590820184790  |
| H | -9.25085843925573 | 2.00241358147017 | -0.52982004859681 |
| C | -7.10331185152922 | 4.09619852177887 | 1.13311070975834  |
| H | -6.21182060758617 | 3.86934330600375 | 1.72897492910600  |
| H | -7.86033312050504 | 4.58596939269415 | 1.75753340559537  |
| H | -6.83555307333920 | 4.74169239003536 | 0.28839968491734  |
| H | -6.95609197983575 | 2.34955340116652 | 0.03526277984232  |
| H | -7.85900926904523 | 2.19242550614013 | 1.39633638229801  |

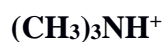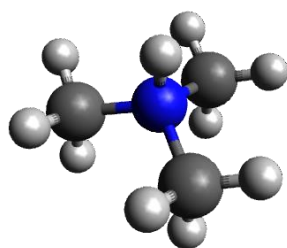

|   |                   |                  |                   |
|---|-------------------|------------------|-------------------|
| N | -3.97958143762654 | 6.14643801836740 | -1.89349766965056 |
| C | -5.40470489641498 | 6.50625598883218 | -2.14082755932457 |
| H | -5.98306008524150 | 5.58624120816614 | -2.28363940260036 |
| H | -5.46562834466731 | 7.13079634842502 | -3.03976914148429 |
| H | -5.78325029179740 | 7.05972960351966 | -1.27222902899645 |
| C | -3.11233066544931 | 7.35313160583547 | -1.77459792891928 |
| H | -2.07210181234608 | 7.02794436196019 | -1.65252321984923 |
| H | -3.43195341764342 | 7.93470142839424 | -0.90033050267689 |
| H | -3.21350960474166 | 7.95640363295664 | -2.68472882495850 |
| C | -3.83438474147191 | 5.24170984647950 | -0.71858482911706 |
| H | -4.43286772146109 | 4.33993417351429 | -0.88932596966421 |
| H | -4.18842682314933 | 5.76816356268426 | 0.17677477847760  |
| H | -2.77807426422828 | 4.97153542807545 | -0.60506570485877 |
| H | -3.65261589376118 | 5.62403479278955 | -2.71728499637743 |

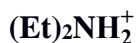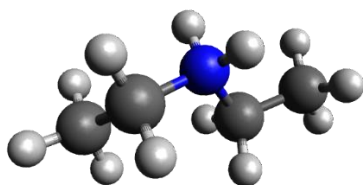

|   |                  |                  |                  |
|---|------------------|------------------|------------------|
| N | 2.16086087972950 | 5.78576880915513 | 3.24110876494368 |
| C | 2.00043504645312 | 4.80333706427063 | 4.36472364734366 |
| C | 1.14024920741943 | 3.63266273096034 | 3.93760597884137 |
| H | 1.55817377101835 | 5.34756119596603 | 5.20817700345576 |
| H | 3.00979141525150 | 4.47608481767317 | 4.64986799193033 |
| H | 0.13542733976714 | 3.95973539683526 | 3.62661440764469 |
| H | 1.02758622332300 | 2.93951802336503 | 4.78390539818188 |
| H | 1.60643859214301 | 3.08301195386814 | 3.10468444589800 |
| C | 3.26989896728844 | 6.78757528818911 | 3.39205538097159 |
| H | 1.27164003663265 | 6.28525450079921 | 3.10528321239810 |
| C | 3.11743934945906 | 7.64460102461455 | 4.63191018955066 |
| H | 3.25260625485955 | 7.39900370331618 | 2.47996551481774 |
| H | 4.20643213024725 | 6.21312731079203 | 3.40034986281070 |
| H | 2.14081617919232 | 8.15467952626922 | 4.65039731766488 |
| H | 3.89787525216413 | 8.41985286079229 | 4.62378065310468 |
| H | 3.23266006444162 | 7.06182342554105 | 5.55757276238705 |
| H | 2.32305929060994 | 5.26610236759264 | 2.36903746805523 |

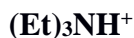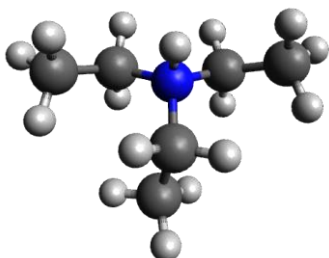

|   |          |          |          |
|---|----------|----------|----------|
| N | 2.258273 | 5.793540 | 3.044243 |
| C | 1.957279 | 5.186795 | 4.392124 |
| C | 1.139815 | 3.913242 | 4.309258 |
| H | 1.462328 | 5.961385 | 4.993182 |
| H | 2.934588 | 4.983152 | 4.849200 |
| H | 0.110592 | 4.082365 | 3.960130 |
| H | 1.080163 | 3.479412 | 5.318482 |
| H | 1.620399 | 3.169006 | 3.654846 |
| C | 3.202703 | 6.964868 | 3.182547 |
| C | 1.031442 | 6.097554 | 2.211280 |
| C | 3.883518 | 7.343058 | 1.879167 |
| H | 3.947811 | 6.655944 | 3.925989 |
| H | 2.628491 | 7.798098 | 3.609666 |
| H | 4.386965 | 6.474720 | 1.423534 |

|   |           |          |          |
|---|-----------|----------|----------|
| H | 4.654755  | 8.095643 | 2.098828 |
| H | 3.195189  | 7.781332 | 1.142460 |
| C | -0.002555 | 6.964895 | 2.903743 |
| H | 0.607170  | 5.128814 | 1.918106 |
| H | 1.398529  | 6.576738 | 1.295797 |
| H | -0.488326 | 6.454452 | 3.748021 |
| H | -0.784681 | 7.202561 | 2.167858 |
| H | 0.414363  | 7.918510 | 3.260592 |
| H | 2.775279  | 5.074985 | 2.519865 |

### EtNH<sub>3</sub><sup>+</sup>

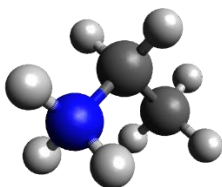

|   |                  |                  |                  |
|---|------------------|------------------|------------------|
| N | 2.21752967853705 | 5.72305665174775 | 3.20879376612482 |
| C | 2.06998510343645 | 4.75917889189441 | 4.34571868500161 |
| C | 1.12269641834171 | 3.63566028973341 | 3.98967115051323 |
| H | 1.71223771972117 | 5.34284338611604 | 5.20361257948662 |
| H | 3.07607795998975 | 4.38414923360321 | 4.57399446634393 |
| H | 0.11254784097916 | 4.01609263224428 | 3.76927551549958 |
| H | 1.04994045023491 | 2.94270428363748 | 4.84085498828988 |
| H | 1.48503639718562 | 3.06648130356740 | 3.11873451627070 |
| H | 1.31939713661610 | 6.16345920926983 | 2.97028322456311 |
| H | 2.56320607635793 | 5.25769847177922 | 2.35985161777626 |
| H | 2.87684521860014 | 6.47684564640696 | 3.43755949013025 |

### H<sub>3</sub>O<sup>+</sup>

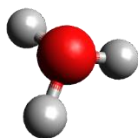

|   |                  |                  |                   |
|---|------------------|------------------|-------------------|
| O | 1.82322557966720 | 2.05185761775306 | -1.00295481569697 |
| H | 2.78385740197037 | 2.23431501012614 | -0.92893074565989 |
| H | 1.49432823397403 | 1.78983966717796 | -0.11747820581479 |
| H | 1.37754878438839 | 2.88701770494283 | -1.25758623282835 |

### nBuNH<sub>3</sub><sup>+</sup>

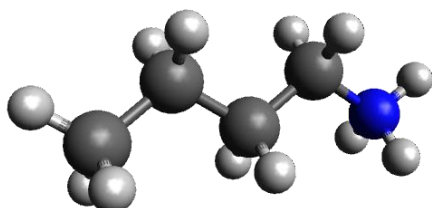

|   |                   |                   |                   |
|---|-------------------|-------------------|-------------------|
| C | 1.89018591804012  | 1.57159187069502  | -1.07115389709004 |
| N | 3.12591851674589  | 1.78913466813295  | -1.88724052290792 |
| H | 3.04990465756772  | 2.63176939752269  | -2.47064621298630 |
| H | 3.95577475666168  | 1.90041757526741  | -1.29066148320885 |
| C | 2.06353476191366  | 0.39681279388051  | -0.12588563509004 |
| H | 1.06969047167947  | 1.41145548761001  | -1.78257786362506 |
| H | 1.69857816056796  | 2.50566796767459  | -0.52547346639571 |
| C | 0.78540867480724  | 0.08180793340506  | 0.65662902255469  |
| H | 2.88332551230239  | 0.62303517077255  | 0.57758991383275  |
| H | 2.37490055534258  | -0.49327033003395 | -0.70195020992671 |
| C | 0.99274785200105  | -1.01941638299992 | 1.69192418916803  |
| H | 0.42353458658439  | 0.99742074997478  | 1.15773583655136  |
| H | -0.00694061733244 | -0.21417249609895 | -0.05185065280805 |
| H | 1.73214914659449  | -0.71617065053291 | 2.45124755306398  |
| H | 1.36247700817858  | -1.94562241590600 | 1.22038261158187  |
| H | 0.05530826376299  | -1.26256490667738 | 2.21696376102320  |
| H | 3.30554177458223  | 0.99471356731355  | -2.51510294373721 |

$\text{NH}_4^+$

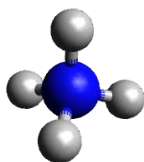

|   |                  |                  |                   |
|---|------------------|------------------|-------------------|
| N | 1.44545342403431 | 2.70286435324947 | -0.67319882177380 |
| H | 2.22989556561697 | 3.24191579576873 | -0.28816457230533 |
| H | 1.18730843746819 | 3.08413747610210 | -1.59125906659090 |
| H | 0.64106563236058 | 2.76259266438762 | -0.03816541119433 |
| H | 1.72954694051994 | 1.72151971049208 | -0.78002212813564 |

$\text{PhNH}_3^+$

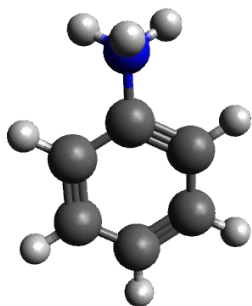

|   |                  |                  |                   |
|---|------------------|------------------|-------------------|
| H | 4.25387329641357 | 1.56464264063212 | -0.97829097664594 |
| C | 3.69836697201992 | 2.48145208694064 | -1.18671444507386 |
| C | 2.31072315682809 | 2.52177322986716 | -1.01531167259636 |
| H | 1.77665562986605 | 1.63230802396367 | -0.67427872844472 |
| C | 1.60534309238205 | 3.70223213158144 | -1.26783990236322 |
| H | 0.52355568980802 | 3.73884548131762 | -1.12399980391323 |

|   |                  |                   |                   |
|---|------------------|-------------------|-------------------|
| C | 2.28036483149023 | 4.84709430697439  | -1.69786345223802 |
| H | 1.74108500171111 | 5.77478763591116  | -1.90278502835923 |
| C | 3.66069258028412 | 4.78235144673691  | -1.86679798639988 |
| C | 4.38534183183740 | 3.61924274924179  | -1.61707339851199 |
| H | 5.46854967091764 | 3.598997111109389 | -1.75813878417622 |
| N | 4.37005890301843 | 5.97076874874521  | -2.35551914039402 |
| H | 3.88274280860485 | 6.84077441347629  | -2.10331624510724 |
| H | 5.32239580993958 | 6.03166872009216  | -1.97168327011930 |
| H | 4.46071072487894 | 5.96285127342555  | -3.38269716565676 |

### PrNH<sub>3</sub><sup>+</sup>

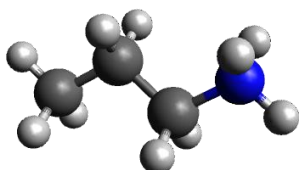

|   |                  |                  |                   |
|---|------------------|------------------|-------------------|
| N | 4.23011650422479 | 5.60722529732583 | -2.38896121903451 |
| C | 3.37532253193686 | 4.54733959887600 | -1.77279983797069 |
| H | 5.13690182162632 | 5.68652650402193 | -1.91230811297723 |
| H | 3.77507408629726 | 6.52755864442984 | -2.34423527753258 |
| C | 4.07220360375828 | 3.19862819295978 | -1.79157550137032 |
| H | 2.43631216786886 | 4.53006431802202 | -2.34120059078520 |
| H | 3.15172547010630 | 4.87728190449511 | -0.74960068197906 |
| C | 3.18922124274181 | 2.10885934745919 | -1.19164891798677 |
| H | 4.33744747230292 | 2.93919655996410 | -2.83099018543366 |
| H | 5.01921914350057 | 3.27049349583083 | -1.23032486752844 |
| H | 2.24311449105747 | 2.00838238780624 | -1.74682418640921 |
| H | 2.93548197546140 | 2.33055973964739 | -0.14167389643945 |
| H | 3.70010471546877 | 1.13414092175922 | -1.21714188279629 |
| H | 4.42308477364840 | 5.40567308740253 | -3.37887484175659 |

### PyridineH<sup>+</sup>

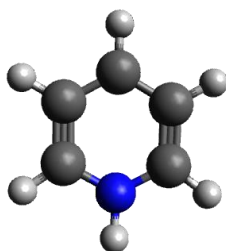

|   |                   |                  |                   |
|---|-------------------|------------------|-------------------|
| H | -0.24649092888731 | 4.96527394517997 | -2.55566290918922 |
| C | -0.03972392094022 | 4.38168650617815 | -1.65920525467372 |
| C | 0.32216120622934  | 4.93006371544447 | -0.43987930277556 |
| H | 0.42080916231730  | 6.01133834234120 | -0.34468140122966 |
| C | 0.55824871070628  | 4.07654817160023 | 0.64178108118293  |
| H | 0.85183488899031  | 4.49281551501430 | 1.60736254522259  |
| C | 0.42676562656583  | 2.69324504220051 | 0.48433276344553  |

|   |                   |                  |                   |
|---|-------------------|------------------|-------------------|
| H | 0.60859533096259  | 2.00584439305660 | 1.30980650813504  |
| C | 0.06261223954588  | 2.19123728571111 | -0.75421133862282 |
| H | -0.06684185319812 | 1.13098249787566 | -0.97159451959297 |
| N | -0.15588753106143 | 3.04481600654786 | -1.77250857405407 |
| H | -0.43087293123045 | 2.65654857884996 | -2.67753959784808 |

## ANIONS

### CH<sub>2</sub>CHO<sup>-</sup>

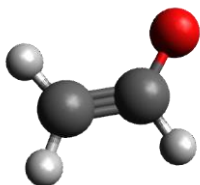

|   |                   |                  |                   |
|---|-------------------|------------------|-------------------|
| C | -6.89892301250380 | 4.13592854662754 | -1.64528297798561 |
| O | -6.73981552831611 | 4.48873768630204 | -0.39215571131396 |
| C | -7.88032962401289 | 4.51352521547082 | -2.50881933136064 |
| H | -6.12815277280401 | 3.44064754237821 | -2.05591566966663 |
| H | -8.69071230637206 | 5.18642495256135 | -2.20304626562893 |
| H | -7.89019675599114 | 4.12127605666004 | -3.53020004404423 |

### CH<sub>2</sub>CN<sup>-</sup>

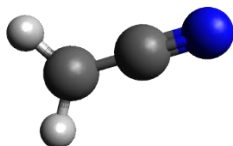

|   |                   |                  |                   |
|---|-------------------|------------------|-------------------|
| C | -7.00393013372671 | 1.12245312093306 | -0.20397852016239 |
| C | -5.70867499784008 | 0.74049310409774 | -0.00592109480188 |
| H | -7.50612453382903 | 1.74863772434914 | 0.53869825004641  |
| H | -7.61007396478454 | 0.62197550020405 | -0.96401751933623 |
| N | -4.56193636981963 | 0.42599055041601 | 0.15333888425408  |

### CH<sub>2</sub>COOEt<sup>-</sup>

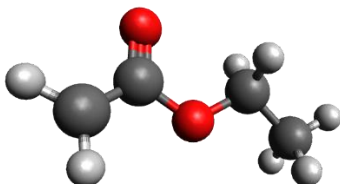

|   |                   |                  |                   |
|---|-------------------|------------------|-------------------|
| C | -7.00006349197201 | 4.52472182650670 | -1.70913862173307 |
| O | -6.60185217992552 | 5.20671523901608 | -0.70139247881068 |
| C | -8.18344598977791 | 4.61302297032628 | -2.39162591993905 |
| O | -6.10253086079796 | 3.56110822651282 | -2.22153802446146 |
| H | -8.91043573601535 | 5.37893080972408 | -2.11382756584967 |
| H | -8.41119792666744 | 3.93766982882185 | -3.21835433829581 |

|   |                   |                  |                   |
|---|-------------------|------------------|-------------------|
| C | -5.11822455213600 | 3.03096188257605 | -1.33238930328915 |
| C | -4.27854234219276 | 2.02679447810117 | -2.09526099767740 |
| H | -5.61891999854763 | 2.54925502164909 | -0.47244929823797 |
| H | -4.48701019243778 | 3.84204187345475 | -0.93448934991115 |
| H | -4.90178452728344 | 1.21763586959850 | -2.50855981092382 |
| H | -3.53159451994760 | 1.57287304929164 | -1.42494697837209 |
| H | -3.74137768229859 | 2.50902892442100 | -2.92801731249867 |

### CH<sub>2</sub>NO<sub>2</sub>

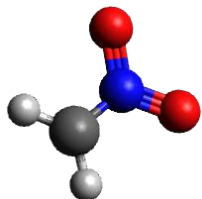

|   |                   |                  |                   |
|---|-------------------|------------------|-------------------|
| N | -7.17281531317300 | 4.29476683004891 | -1.50291148740291 |
| O | -7.11436616222345 | 4.87510193026858 | -0.34048627589202 |
| C | -8.07117814740505 | 4.63392184604624 | -2.39434475859873 |
| H | -8.77304611491009 | 5.42553366318240 | -2.14162554177619 |
| H | -8.06753834015310 | 4.11692513687565 | -3.35121864464046 |
| O | -6.29241592213532 | 3.36483059357822 | -1.73940329168969 |

### CH<sub>3</sub>CHCN<sup>-</sup>

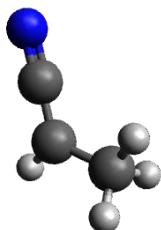

|   |                   |                  |                   |
|---|-------------------|------------------|-------------------|
| C | -5.20334232010727 | 6.42128126412473 | -2.18323370348163 |
| C | -4.91781911971468 | 4.95674712857095 | -1.93238651077936 |
| H | -5.39374764023788 | 7.01592667587628 | -1.26346863381181 |
| H | -6.09277982446842 | 6.57387241358885 | -2.82434944832315 |
| H | -4.36152442490150 | 6.91128295755901 | -2.70241643012222 |
| C | -3.65454722241168 | 4.44587316054059 | -1.89202214940952 |
| H | -5.71901322209422 | 4.32429462207071 | -1.53264093232786 |
| N | -2.54218622606435 | 3.98684177766889 | -1.90369219174445 |

### CH<sub>3</sub>COCH<sub>2</sub>

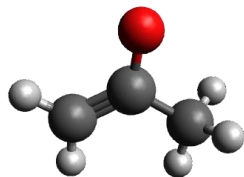

|   |                   |                  |                   |
|---|-------------------|------------------|-------------------|
| C | -5.51077616625207 | 5.43196468817379 | -1.99751421403969 |
|---|-------------------|------------------|-------------------|

|   |                   |                  |                   |
|---|-------------------|------------------|-------------------|
| O | -4.97665176273235 | 6.47847430390667 | -1.39505047287768 |
| C | -6.84601752453996 | 5.68383171163215 | -2.68261743066611 |
| H | -6.73755627370843 | 6.45059020266227 | -3.46987551670635 |
| H | -7.57464023968180 | 6.08131391551989 | -1.95433641494385 |
| H | -7.26914569061642 | 4.77703330024219 | -3.14152148885156 |
| C | -4.95636062912192 | 4.18447273935433 | -2.03726544936527 |
| H | -5.44633947130535 | 3.35951328521240 | -2.56041183013134 |
| H | -3.99232224204168 | 3.98196585329630 | -1.55664718241815 |

### CH<sub>3</sub>COO<sup>-</sup>

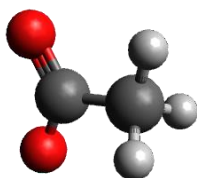

|   |                   |                  |                   |
|---|-------------------|------------------|-------------------|
| C | -5.41412357922854 | 5.34925614585977 | -2.29858541179346 |
| O | -4.53552179920640 | 6.26062497466666 | -2.31404786447835 |
| C | -6.85844302344851 | 5.72164955604454 | -2.61207475625722 |
| H | -6.94844001113820 | 6.74931597475928 | -2.99151089489785 |
| H | -7.45841950404704 | 5.62662102234569 | -1.69180451341413 |
| H | -7.28681694114534 | 5.02371661907550 | -3.34701784530706 |
| O | -5.17463514178596 | 4.13606570724855 | -2.02012871385194 |

### CH<sub>3</sub>S<sup>-</sup>

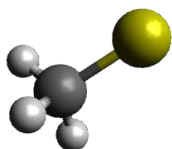

|   |                   |                  |                   |
|---|-------------------|------------------|-------------------|
| S | -5.12230555626336 | 5.33300211888912 | -2.24640429695578 |
| C | -6.87775034154717 | 5.71774308783799 | -2.60538367664759 |
| H | -7.04491864054833 | 6.76718689876354 | -2.93128570008381 |
| H | -7.54811962735890 | 5.57185202474898 | -1.73138569845269 |
| H | -7.31604583428224 | 5.09281586976037 | -3.41148062786013 |

### CH<sub>3</sub>SO<sub>3</sub><sup>-</sup>

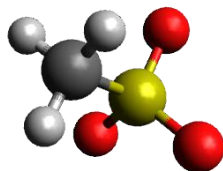

|   |                   |                  |                   |
|---|-------------------|------------------|-------------------|
| S | -5.37556917835362 | 5.02695834088013 | -2.32801246330592 |
| C | -6.91110605634121 | 5.93181313641765 | -2.48788143255482 |
| H | -6.67182292324628 | 6.98407062150696 | -2.68950209023986 |



|   |                   |                  |                   |
|---|-------------------|------------------|-------------------|
| H | -7.46222002678808 | 5.83311011956469 | -1.54284695012906 |
| H | -7.48604796122157 | 5.49769961165789 | -3.31578823400146 |
| O | -4.61814000968790 | 5.22247354300576 | -3.61147311541786 |
| O | -4.65838042723524 | 5.61731124266918 | -1.14781208491336 |
| O | -5.75499341712610 | 3.59011338429774 | -2.10616362943766 |

### CN<sup>-</sup>

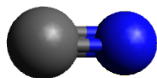

|   |                   |                  |                  |
|---|-------------------|------------------|------------------|
| C | -6.66526831367756 | 2.24487392055595 | 0.94855809235265 |
| N | -5.62385168632244 | 2.69004607944405 | 1.27420190764735 |

### EtO<sup>-</sup>

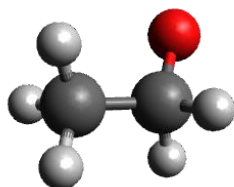

|   |                   |                  |                   |
|---|-------------------|------------------|-------------------|
| C | -6.32285599543338 | 1.18773376333951 | 0.41371041750000  |
| C | -5.15791393888931 | 2.08193640153035 | 0.84431722167518  |
| H | -6.22467221900767 | 0.89539859123041 | -0.64718859885389 |
| H | -7.29175063618982 | 1.70557064854509 | 0.53658230399242  |
| H | -6.35593757699805 | 0.25961896289710 | 1.00994839148713  |
| O | -3.89995045974113 | 1.49582010778219 | 0.67898720597248  |
| H | -5.34603437787699 | 2.37942820493083 | 1.90761387500794  |
| H | -5.24400479586365 | 3.03923331974453 | 0.27244918321874  |

### HCC<sup>-</sup>

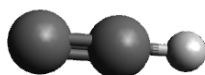

|   |                   |                  |                  |
|---|-------------------|------------------|------------------|
| C | -7.94820845943289 | 2.49542373242551 | 0.11325045712915 |
| C | -6.72919281625970 | 2.72775042307696 | 0.05963540693328 |
| H | -9.00261872430741 | 2.26560584449753 | 0.16045413593756 |

### HCOO<sup>-</sup>

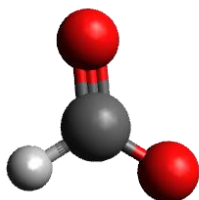

|   |                   |                  |                  |
|---|-------------------|------------------|------------------|
| C | -4.18022874661894 | 2.04385490355348 | 2.45220695319593 |
|---|-------------------|------------------|------------------|

|   |                   |                  |                  |
|---|-------------------|------------------|------------------|
| O | -4.43921666872617 | 0.86608776202389 | 2.08917010116883 |
| O | -3.10142405682632 | 2.66936959644229 | 2.27451698640108 |
| H | -4.99655052782856 | 2.59410773798034 | 2.99073595923416 |

### HO<sub>2</sub><sup>-</sup>

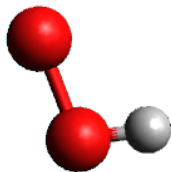

|   |                    |                   |                  |
|---|--------------------|-------------------|------------------|
| O | -10.47610929782990 | -2.07860103031874 | 3.30276218915402 |
| O | -9.08621512314413  | -1.78674556272680 | 2.87092696638120 |
| H | -10.74634557902596 | -1.25348340695446 | 3.73487084446478 |

### HS<sup>-</sup>

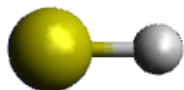

|   |                    |                   |                  |
|---|--------------------|-------------------|------------------|
| S | -10.31332376133084 | -2.11470810579772 | 3.22443601021599 |
| H | -10.99464623866916 | -1.13660189420228 | 3.87874398978401 |

### MeO<sup>-</sup>

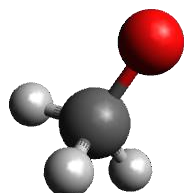

|   |                   |                  |                  |
|---|-------------------|------------------|------------------|
| C | -4.84797428677519 | 1.18674136715400 | 2.81461193635869 |
| O | -5.15795224371670 | 2.53955837752645 | 2.66660496971878 |
| H | -3.90356879308668 | 0.88284477775894 | 2.29842346148243 |
| H | -5.63171053111166 | 0.50149244658282 | 2.40751925929437 |
| H | -4.71284414530977 | 0.87469303097779 | 3.87989037314573 |

### N<sub>3</sub><sup>-</sup>

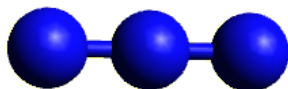

|   |                   |                   |                   |
|---|-------------------|-------------------|-------------------|
| N | -4.72717001565941 | -0.97333999215352 | 0.61498000703168  |
| N | -4.38988087053328 | -1.79012713746034 | 1.39797297016922  |
| N | -5.06445911380730 | -0.15655287038614 | -0.16801297720089 |

**OBr<sup>-</sup>**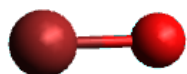

|    |                   |                  |                   |
|----|-------------------|------------------|-------------------|
| O  | -5.16881290513731 | 1.81590996168867 | -2.01481894586070 |
| Br | -5.06519709486269 | 0.44874003831133 | -0.73280105413930 |

**OCI<sup>-</sup>**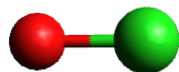

|    |                   |                  |                   |
|----|-------------------|------------------|-------------------|
| O  | -5.16504637563532 | 1.76621208414478 | -1.96821642257343 |
| Cl | -5.06896362436468 | 0.49843791585522 | -0.77940357742657 |

**OH<sup>-</sup>**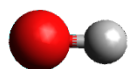

|   |                   |                  |                   |
|---|-------------------|------------------|-------------------|
| O | -5.14370762939576 | 1.48465570791241 | -1.70419634307486 |
| H | -5.09030237060424 | 0.77999429208759 | -1.04342365692514 |

**OI<sup>-</sup>**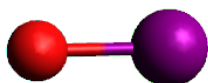

|   |                   |                  |                   |
|---|-------------------|------------------|-------------------|
| O | -5.17274288059637 | 1.86776444444561 | -2.06344375359209 |
| I | -5.06126711940363 | 0.39688555555439 | -0.68417624640791 |

**PH<sub>2</sub>**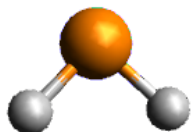

|   |                   |                   |                   |
|---|-------------------|-------------------|-------------------|
| P | -4.88848015970551 | 0.24552972322619  | -0.53224740291402 |
| H | -3.67096392332364 | -0.27130304387350 | 0.02547613431355  |
| H | -4.20145591697085 | 1.18788332064731  | -1.36886873139953 |

**PhCOCH<sub>2</sub>**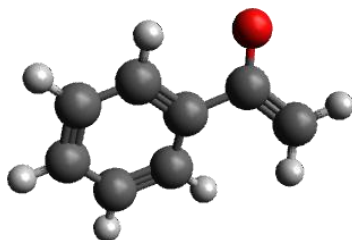

|   |                   |                   |                  |
|---|-------------------|-------------------|------------------|
| H | -2.88687312946137 | -3.12579691470618 | 3.82415252839596 |
| C | -3.55960481426617 | -2.83436767604172 | 3.01503586531727 |
| C | -4.89762010804538 | -3.27665552618848 | 3.02312374615125 |
| C | -5.73621344807889 | -2.83390527892715 | 1.98394771255107 |

|   |                   |                   |                  |
|---|-------------------|-------------------|------------------|
| H | -6.77771786494124 | -3.16076583195969 | 1.98033899329879 |
| C | -5.25960327779454 | -2.00133316476406 | 0.96637019128880 |
| H | -5.93559761780679 | -1.67641961727001 | 0.17082663859062 |
| C | -3.92605197269234 | -1.57998069288338 | 0.96826579363393 |
| H | -3.54960098979430 | -0.92473396285823 | 0.17823946929671 |
| C | -3.08062400111443 | -2.00014737741548 | 2.00160369403519 |
| H | -2.04140648493731 | -1.66147278630301 | 2.02565600825206 |
| C | -5.45733736169111 | -4.17972554007523 | 4.10187307081140 |
| O | -6.75878825890570 | -4.13825670302810 | 4.27807870282759 |
| C | -4.60981862095420 | -4.98955562377074 | 4.81071665962669 |
| H | -3.54047060144669 | -5.04267841446940 | 4.59792937001019 |
| H | -5.00698144806954 | -5.64624488933914 | 5.59202155591245 |

### PhCOO<sup>-</sup>

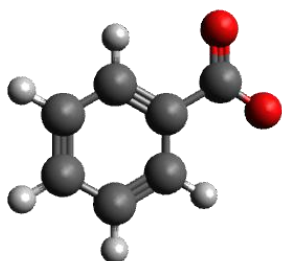

|   |                   |                   |                  |
|---|-------------------|-------------------|------------------|
| H | -2.89320327384034 | -3.23883561558791 | 3.77464666952200 |
| C | -3.56039263048675 | -2.87793028168260 | 2.98988664826535 |
| C | -4.90854990061077 | -3.27202579407909 | 3.00526476712921 |
| C | -5.75747300195704 | -2.80411693638578 | 1.98877521048608 |
| H | -6.80489916303692 | -3.11114498721808 | 1.98953424841373 |
| C | -5.27465723486376 | -1.96010185562495 | 0.98459359771311 |
| H | -5.94975326261834 | -1.60260323137745 | 0.20311520866219 |
| C | -3.93052417021968 | -1.57030569958269 | 0.98237132607311 |
| H | -3.55025989292620 | -0.90870319363144 | 0.19945581144716 |
| C | -3.07522378022564 | -2.03286445961389 | 1.98813462649440 |
| H | -2.02612741131813 | -1.72643402184493 | 1.99336829819146 |
| C | -5.43594882669036 | -4.18202277643191 | 4.10653761469184 |
| O | -6.66244912257159 | -4.49279419647498 | 4.08175386741403 |
| O | -4.61724832863448 | -4.57696695046430 | 4.98673210549632 |

### PhNH<sup>-</sup>

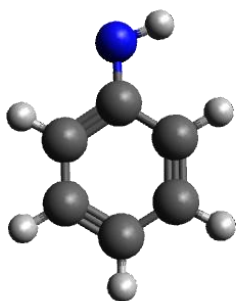

|   |                   |                   |                  |
|---|-------------------|-------------------|------------------|
| H | -2.97969947343840 | -3.25451805292142 | 3.83967154280453 |
| C | -3.63700892252850 | -2.90280141471698 | 3.03586887927672 |
| C | -5.00788524022499 | -3.33615312501636 | 3.04535121809701 |
| C | -5.79650039086202 | -2.83935013166759 | 1.95180038127114 |
| H | -6.84640872550000 | -3.14675913453268 | 1.89526184581698 |
| C | -5.27422329913949 | -1.99572389235686 | 0.97630217379964 |
| H | -5.93183065749036 | -1.64726499644524 | 0.17233983012346 |
| C | -3.93075901676157 | -1.58126393992506 | 1.00397574740778 |
| H | -3.52521535695664 | -0.91785230837808 | 0.23620777734026 |
| C | -3.12894092785170 | -2.05526310358499 | 2.05472075565246 |
| H | -2.07830637331214 | -1.74964996106652 | 2.11201651192083 |
| N | -5.55007174050493 | -4.14300993457540 | 3.98746955892040 |
| H | -4.82429987542925 | -4.38050000481281 | 4.66961377756879 |

### PhO<sup>-</sup>

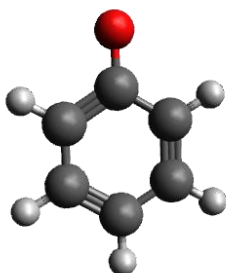

|   |                   |                   |                  |
|---|-------------------|-------------------|------------------|
| H | -3.00309894973980 | -3.27097850583877 | 3.85434487486579 |
| C | -3.64871713333957 | -2.90898018008581 | 3.04773336029683 |
| C | -5.01371624037780 | -3.32659473700420 | 3.03819526964779 |
| C | -5.80518464496757 | -2.84204032109312 | 1.95321617894496 |
| H | -6.85319499327427 | -3.15509671357816 | 1.90137719389252 |
| C | -5.27825549541699 | -1.99754823866362 | 0.97544035229216 |
| H | -5.92861980456857 | -1.64576216505520 | 0.16804016385001 |
| C | -3.93631277211105 | -1.59209523993408 | 1.01617601129293 |
| H | -3.52663485380274 | -0.92890500333446 | 0.25034422613905 |
| C | -3.13374037600940 | -2.06305818880454 | 2.06474017342170 |
| H | -2.08341446248269 | -1.75888448967212 | 2.11977813338006 |
| O | -5.50900027390954 | -4.10755621693593 | 3.97012406197620 |

### PhS<sup>-</sup>

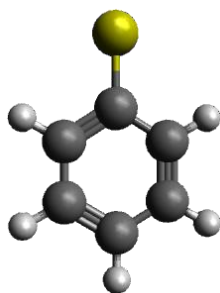

|   |                   |                   |                  |
|---|-------------------|-------------------|------------------|
| H | -2.99626314915840 | -3.24283840905162 | 3.83012152689452 |
| C | -3.64054427342968 | -2.88540353676533 | 3.02101806231779 |
| C | -5.00153833638842 | -3.31081972073131 | 3.01403172682250 |
| C | -5.78708615662884 | -2.81860607540383 | 1.93078602207525 |
| H | -6.83546869617126 | -3.12829203078715 | 1.88153103958415 |
| C | -5.26436092991363 | -1.97432470894612 | 0.95028742524433 |
| H | -5.91764015356609 | -1.62289978853688 | 0.14495218570265 |
| C | -3.92105839010707 | -1.57073492990605 | 0.98837899653289 |
| H | -3.50998214627351 | -0.91085940617556 | 0.22001461098540 |
| C | -3.11987857650951 | -2.04057038093232 | 2.03960832358876 |
| H | -2.06920517354582 | -1.73703399960475 | 2.09714862906018 |
| S | -5.65686401830777 | -4.35511701315908 | 4.24163145119157 |

### Tert-Buo<sup>-</sup>

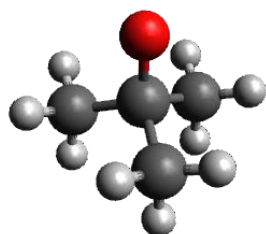

|   |                   |                   |                   |
|---|-------------------|-------------------|-------------------|
| C | -4.84235830513223 | -1.62192110313009 | 0.09736545770173  |
| C | -6.36751428797601 | -1.59065801353759 | -0.13984240397363 |
| H | -6.68064686596958 | -2.23007636921286 | -0.98289430590765 |
| H | -6.70617039262964 | -0.56278273829010 | -0.35655556894578 |
| H | -6.90403145920950 | -1.94036967445662 | 0.75881680971427  |
| C | -4.42287049025056 | -3.08291785788857 | 0.37667384318859  |
| H | -4.93481885383676 | -3.46618198633143 | 1.27549245308543  |
| H | -3.33589253957288 | -3.14266154788937 | 0.55654184573047  |
| H | -4.66414184327589 | -3.76233088990477 | -0.45904750174439 |
| C | -4.13669091404698 | -1.14540977404334 | -1.19129999837525 |
| H | -4.38929327832034 | -1.76506439255222 | -2.06878209112876 |
| H | -3.04079032046627 | -1.17099797543567 | -1.06293042745613 |
| H | -4.42354817980464 | -0.10473533355305 | -1.42149804248398 |
| O | -4.49426226950874 | -0.79567234377432 | 1.17792993059507  |
